# 1 Function of the HYDROXYCINNAMOYL-CoA:SHIKIMATE 2 HYDROXYCINNAMOYL TRANSFERASE is evolutionarily 3 conserved in embryophytes

4  
5 Lucie Kriegshauser<sup>1</sup>, Samuel Knosp<sup>1</sup>, Etienne Grienenberger<sup>1</sup>, Desirée D. Gütle<sup>2</sup>, Iben Sørensen<sup>3</sup>,  
6 Laurence Herrgott<sup>1</sup>, Julie Zumsteg<sup>1</sup>, Jocelyn K.C. Rose<sup>3</sup>, Ralf Reski<sup>2,4</sup>, Danièle Werck-Reichhart<sup>1</sup> &  
7 Hugues Renault<sup>1\*</sup>

8  
9 <sup>1</sup>Institut de biologie moléculaire des plantes, CNRS, University of Strasbourg, France

10 <sup>2</sup>Plant Biotechnology, Faculty of Biology, University of Freiburg, Germany

11 <sup>3</sup>Plant Biology Section, School of Integrative Plant Science, Cornell University, Ithaca, USA

12 <sup>4</sup>CIBSS - Centre for Integrative Biological Signaling Studies, University of Freiburg, Germany

13

14 \*Corresponding author: Hugues RENAULT, renauld@unistra.fr

15

16 **Short title:** HCT functional conservation in embryophytes

17

18 **One sentence summary:** Multidisciplinary study of the *HYDROXYCINNAMOYL-CoA:SHIKIMATE*  
19 *HYDROXYCINNAMOYL TRANSFERASE (HCT)* gene in *Physcomitrium (Physcomitrella) patens*  
20 points to its functional conservation in embryophytes.

21

## 22 **ABSTRACT**

23 The plant phenylpropanoid pathway generates a major class of specialized metabolites and  
24 precursors of essential extracellular polymers that initially appeared upon plant terrestrialization.  
25 Despite its evolutionary significance, little is known about the complexity and function of this major  
26 metabolic pathway in extant bryophytes, the ancestors of which were the first land plants. Here, we  
27 report that the *HYDROXYCINNAMOYL-CoA:SHIKIMATE HYDROXYCINNAMOYL TRANSFERASE*  
28 (*HCT*) gene, which plays a critical function in the phenylpropanoid pathway during seed plant  
29 development, is functionally conserved in *Physcomitrium (Physcomitrella) patens*, in the moss  
30 lineage of bryophytes. Phylogenetic analysis indicates that *bona fide* HCT function emerged in the  
31 progenitor of embryophytes. *In vitro* enzyme assays, moss phenolic pathway reconstitution in yeast  
32 and *in planta* gene inactivation coupled to targeted metabolic profiling collectively indicate that *P.*  
33 *patens* HCT (PpHCT), similar to tracheophyte HCT orthologs, uses shikimate as a native acyl  
34 acceptor to produce a *p*-coumaroyl-5-*O*-shikimate intermediate. Phenotypic and metabolic analyses  
35 of loss-of-function mutants show that PpHCT is necessary for the production of caffeate derivatives,  
36 including previously reported caffeoyl-threonate esters, and for the formation of an intact cuticle.  
37 Deep conservation of HCT function in embryophytes is further suggested by the ability of *HCT*  
38 genes from *P. patens* and the liverwort *Marchantia polymorpha* to complement an *Arabidopsis*  
39 *thaliana* CRISPR/Cas9 *hct* mutant, and by the presence of phenolic esters of shikimate in  
40 representative species of the three major bryophyte lineages.

## 41 INTRODUCTION

42 Land colonization by plants, about 500 million years ago (Wickett et al., 2014; Puttick et al.,  
43 2018; Morris et al., 2018), was one of the most important evolutionary events associated with  
44 terraformation. Through photosynthetic activity and rock weathering, early land plants contributed to  
45 the rise of atmospheric oxygen, carbon sequestration and the development of soils (Lenton et al.,  
46 2016; Porada et al., 2016; Retallack, 1997). Plant settlement on land therefore paved the way for  
47 the development of rich terrestrial ecosystems and the emergence of new life forms (Kenrick and  
48 Crane, 1997).

49 This transition from water to land exposed plants to challenging terrestrial conditions, such  
50 as drought, harmful levels of solar (UV) radiation, lack of buoyancy, extended temperature range,  
51 and novel pathogenic microorganisms (Rensing et al., 2008; de Vries and Archibald, 2018).  
52 Successful land colonization thus required specific developmental and metabolic adaptations  
53 (Reski, 2018). The formation of extracellular, or apoplastic, protective barriers was probably one of  
54 the most critical innovations of land plants, as they shield cells from damaging environmental insults  
55 and allow the formation of specialized structures required for water and nutrient management (e.g.  
56 cuticles and vasculature). In angiosperms, such structures are essentially comprised of four  
57 canonical hydrophobic biopolymers – cutin, suberin, sporopollenin and lignin – that reinforce and  
58 waterproof the polysaccharide-based cell wall (Nawrath et al., 2013).

59 Some precursors of these polymers are generated through the phenylpropanoid pathway,  
60 one of the most important branches of so-called plant specialized metabolism, which also allows the  
61 accumulation of powerful UV screens and antioxidants (Renault et al., 2019; Vogt, 2010; Weng and  
62 Chapple, 2010). The ability to synthesize phenylpropanoids evolved during the course of  
63 terrestrialization and is often regarded as a key adaptation by plants to life on land (Weng and  
64 Chapple, 2010; de Vries et al., 2017; Renault et al., 2019). The most common products generated  
65 by the phenylpropanoid pathway – flavonoids, soluble phenolic esters and biopolymer precursors –  
66 all derive from *p*-coumaroyl-CoA (**Fig. 1A**). This hub molecule is produced through the activities of  
67 three essential enzymes in the initial steps of the phenylpropanoid pathway: phenylalanine  
68 ammonia-lyase (PAL); cinnamate 4-hydroxylase (C4H), which belongs to cytochrome P450 family  
69 73 (CYP73); and 4-coumarate:CoA ligase (4CL) (**Fig. 1A**). In flowering plants, further  
70 functionalization of the phenolic ring requires shikimate ester intermediates and a two-enzyme  
71 module involving hydroxycinnamoyl-CoA:shikimate hydroxycinnamoyl transferase (HCT), which  
72 catalyzes transfer of the *p*-coumaroyl moiety from *p*-coumaroyl-CoA to shikimate (Hoffmann et al.,  
73 2003, 2004), and a second cytochrome P450, *p*-coumaroyl-shikimate 3'-hydroxylase (C3'H or  
74 CYP98), to generate caffeoyl-shikimate (Schoch et al., 2001; Franke et al., 2002; Alber et al., 2019)  
75 (**Fig. 1A**). Although HCT was originally shown to transfer the caffeoyl moiety back to coenzyme A  
76 to form caffeoyl-CoA *in vitro* (Hoffmann et al., 2003; Vanholme et al., 2013), later studies indicated  
77 that this process requires the combined action of caffeoyl shikimate esterase (CSE) and 4CL  
78 (Vanholme et al., 2013; Saleme et al., 2017) (**Fig. 1A**). Recently, a bifunctional ascorbate

79 peroxidase/*p*-coumarate 3-hydroxylase (C3H) was also characterized, revealing an alternative route  
80 to phenolic ring 3-hydroxylation, directly from free *p*-coumaric acid (Barros et al., 2019) (**Fig. 1A**).

81 HCT belongs to clade V of the BAHD acyltransferase superfamily, which features enzymes  
82 that use coenzyme A-activated acyl donors and chemically diverse acceptors, such as organic  
83 acids, amines or fatty acids (D'Auria, 2006). Clade V also includes the closely-related enzymes  
84 hydroxycinnamoyl-CoA:quinic acid hydroxycinnamoyl transferases (HQT), which use quinate as a  
85 preferred acceptor, rather than shikimate. HQT is involved in the production of chlorogenic acids  
86 (CGA, caffeoyl-quinic acid), which have only been reported in some angiosperms (Clifford, 1999).  
87 Unlike caffeoyl-shikimate, CGA is not considered to be a key intermediate in lignin biosynthesis, but  
88 rather involved in responses to biotic and abiotic stresses, especially UV radiation (Clé et al., 2008;  
89 Niggeweg et al., 2004). An investigation of HCT catalytic properties revealed broad acceptor  
90 substrate permissiveness, extending beyond shikimate (Hoffmann et al., 2004, 2003; Sander and  
91 Petersen, 2011; Eudes et al., 2016). However, structural studies of HCT/HQT uncovered key amino  
92 acid residues that control shikimate and/or quinate acylation, thereby specifying the two types of  
93 enzymes (Levsh et al., 2016; Lallemand et al., 2012; Chiang et al., 2018). HCT represents a pivotal  
94 step in controlling lignin biosynthesis and composition, as demonstrated by *HCT* silencing studies in  
95 seed plants that consistently alter lignin content and/or composition, and often lead to adverse  
96 effects on growth (Hoffmann et al., 2004; Wagner et al., 2007; Besseau et al., 2007; Gallego-  
97 Giraldo et al., 2011).

98 Bryophytes and charophyte algae, the embryophyte sister group, are devoid of lignin,  
99 although some of them seem to possess parts of the genetic toolkit required to synthesize phenolic  
100 intermediates (de Vries et al., 2017; Renault et al., 2019; Jiao et al., 2020). The nature and the role  
101 of such early phenylpropanoid derivatives are still poorly documented. We recently showed through  
102 a molecular genetic approach, targeting the *Physcomitrium* (*Physcomitrella*) *patens* *CYP98* gene,  
103 that a moss phenylpropanoid pathway is involved in the synthesis of caffeate precursors necessary  
104 to support cuticular biopolymer formation (Renault et al., 2017). The major acylated products formed  
105 by the moss were shown to be threonate esters (*p*-coumaroyl-threonate and caffeoyl-threonate),  
106 while shikimate and quinate esters were not detected (Renault et al., 2017). However, a survey of  
107 embryophyte *CYP98* *in vitro* substrate preference showed that the moss enzyme poorly converts *p*-  
108 coumaroyl-threonates, compared with *p*-coumaroyl-shikimate (Alber et al., 2019), leaving the nature  
109 of the native pathway intermediates in the moss unclear. Here, we sought to address this question  
110 by performing a functional analysis of a candidate *P. patens* *HCT* gene, which encodes the enzyme  
111 generating the *CYP98* substrate. Combining *in silico*, *in vitro* and *in vivo* analyses, we demonstrate  
112 conservation of HCT catalytic properties and physiological function across the 500 million years of  
113 embryophyte evolution.

114

115

## 116 RESULTS

### 117 **A bona fide HCT gene emerged in an embryophyte progenitor and was subsequently** 118 **conserved**

119 We performed a search for potential *HCT* genes in fully sequenced charophyte and bryophyte  
120 genomes. All BAHD acyltransferase protein sequences from the charophytes *Klebsormidium nitens*  
121 (*Klebsormidiophyceae*), *Chara braunii* (*Characeae*) and *Spirogloea muscicola*,  
122 (*Zygnematophyceae*) and from the bryophytes *P. patens* (moss), *Marchantia polymorpha* (liverwort)  
123 and *Anthoceros agrestis* (hornwort) were aligned with 34 already characterized hydroxycinnamoyl-  
124 CoA-dependent BAHD transferases (complete list in **Tab. S1**) prior to phylogeny reconstruction. The  
125 resulting protein tree structure revealed a well-supported HCT clade with single members for each  
126 bryophyte species at its root (**Fig. 1B**). The angiosperm-specific HQT proteins clustered as a sister  
127 group to angiosperm HCTs, suggesting they originated from *HCT* duplication (**Fig. 1B**). BAHD  
128 enzymes from the charophytes *K. nitens* and *C. braunii* were not closely associated with HCTs, but  
129 rather occupied a basal position with respect to characterized hydroxycinnamoyl-CoA-dependent  
130 BAHD. Proteins from the Zygnematophyceae *S. muscicola* were found to be even more divergent  
131 from characterized HCT proteins (**Fig. 1B**).

132 The multiple protein alignment revealed a strict conservation in representative embryophyte  
133 HCTs of the three residues (Arg356, Thr369 and Trp371) previously shown to be critical for HCT  
134 activity (Lallemand et al., 2012; Levsh et al., 2016; Chiang et al., 2018), whereas their conservation  
135 was only partial in charophyte homologs (**Fig. 1C, Fig. S1**). More particularly, the Arg356 handle  
136 was absent from charophyte BAHDs (**Fig. 1C, Fig. S1**). Finer details were gained through  
137 homology-modelling of HCT candidate proteins from *P. patens* (PpHCT, *Pp3c2\_29140*), *K. nitens*  
138 (*kfl00513\_0110*) and *C. braunii* (*CHBRA170g00210*) using the crystal structure of *Arabidopsis*  
139 *thaliana* AtHCT in complex with *p*-coumaroyl-5-*O*-shikimate as a template. The predicted protein  
140 structures indicated that, similar to AtHCT, PpHCT binds the shikimate carboxyl group through an  
141 arginine handle (**Fig. 1D**). In charophyte proteins, the critical arginine residue was replaced by  
142 leucine (*kfl00513\_0110*) or proline (*CHBRA170g00210*), neither of which is predicted to form  
143 hydrogen bonds with shikimate (**Fig. 1D**). Taken together, these data point to the emergence of  
144 *bona fide HCT* genes in the last common ancestor of embryophytes about 500 Ma, concurrently  
145 with the appearance of cuticles (Philippe et al., 2020) and prior to the capacity to produce the  
146 phenolic biopolymer lignin.

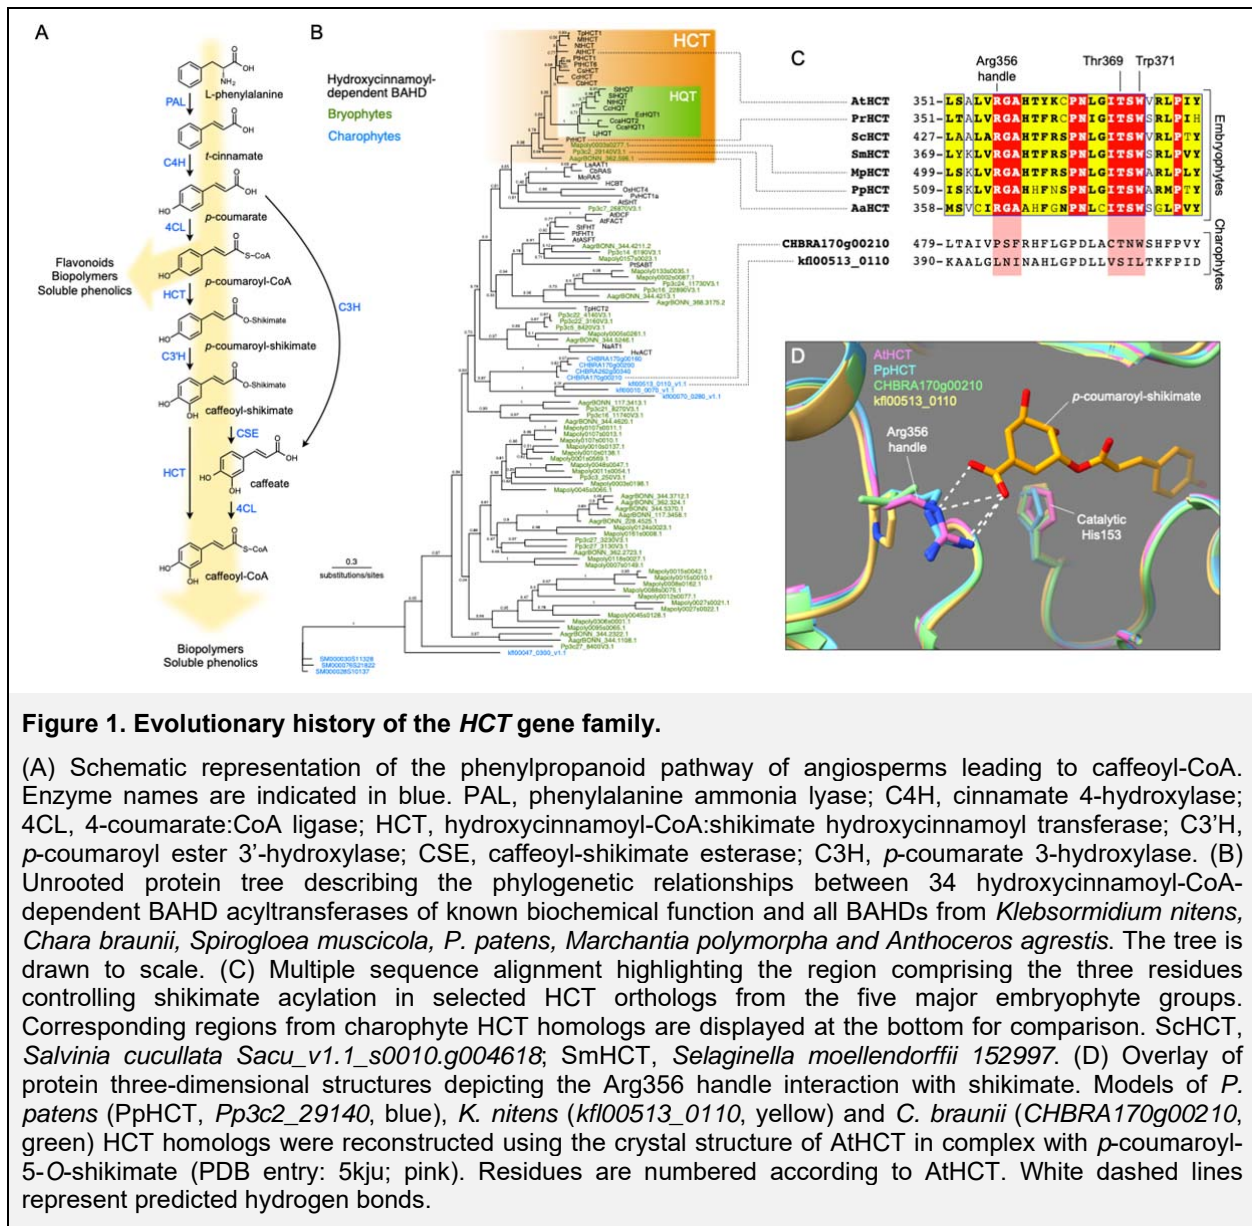

147

148 ***PpHCT* is co-expressed with the *p*-coumaroyl ester 3'-hydroxylase *PpCYP98***

149 We then undertook a functional analysis of the *P. patens* HCT candidate gene (*PpHCT*,  
150 *Pp3c2\_29140*) identified in the phylogenetic analysis. First, we used publicly available co-  
151 expression data derived from the *P. patens* gene atlas project (Perroud et al., 2018). This indicated  
152 that the spatial expression profile of *PpHCT* is tightly correlated with those of two genes encoding  
153 enzymes flanking the HCT step, potentially forming a core enzymatic module in the moss phenolic  
154 pathway: *4-coumarate-CoA ligase 1* (*Pp4CL1*; *Pp3c18\_6360*; (Silber et al., 2008) and the  
155 functionally characterized *PpCYP98* (*Pp3c22\_19010*; (Renault et al., 2017) (**Fig. 1A, 2A**). These  
156 data were supported by our qRT-PCR analysis, which showed higher (at least 4-fold) expression  
157 levels of all three genes in gametophores than in protonema (**Fig. 2B**). To increase the spatial  
158 resolution of the *PpHCT* expression analyses, we generated knock-in *PpHCT:uidA* reporter lines by  
159 homologous recombination (**Fig. S2**). GUS staining was found to be restricted to the apex of both

160 young and old gametophores (**Fig. 2C**), which is very similar to the previously reported  
 161 *PpCYP98:uidA* GUS staining profile (Renault et al., 2017).

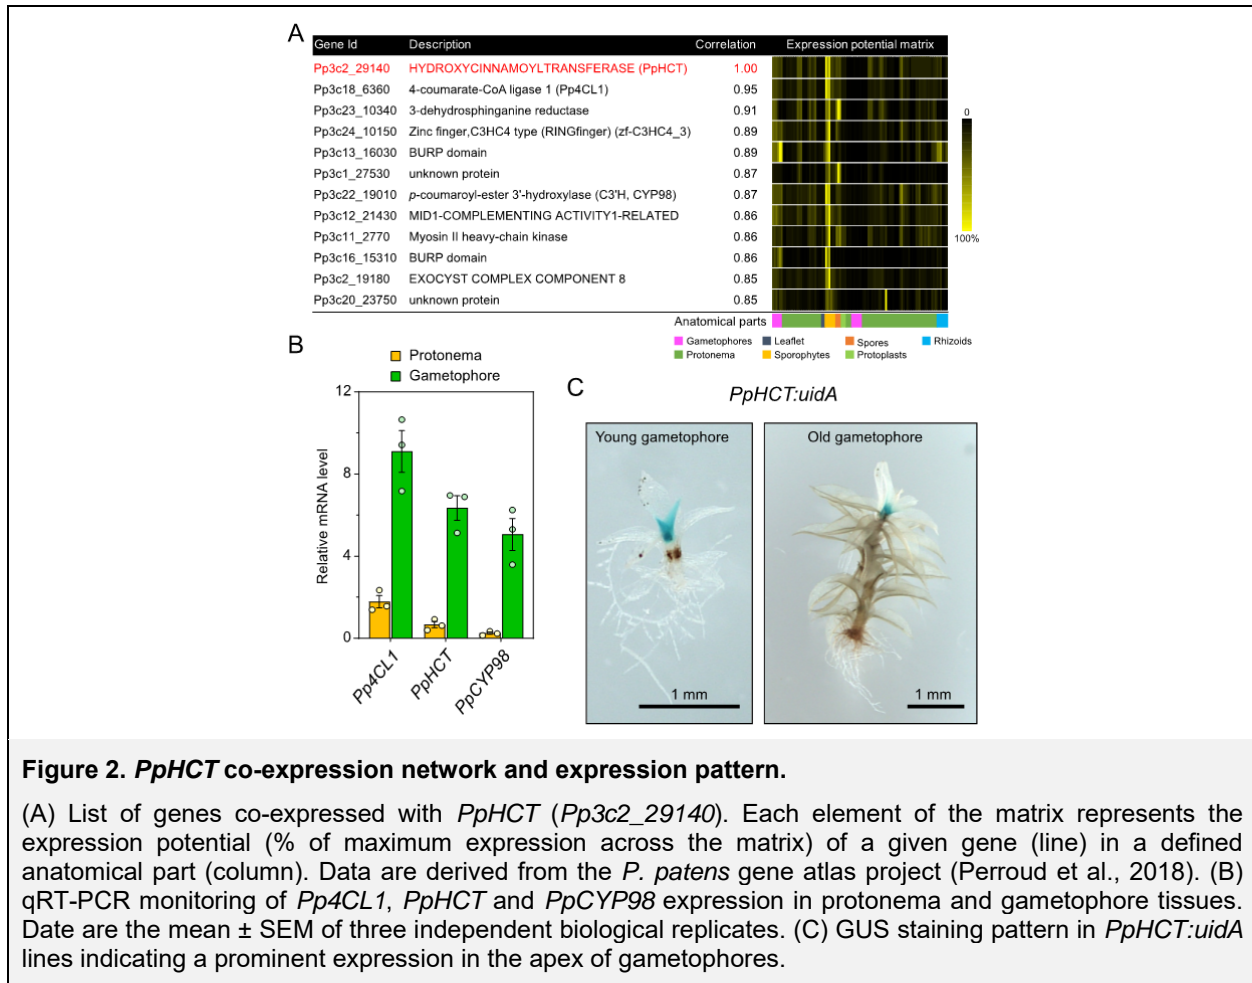

162

### 163 **PpHCT demonstrates substrate permissiveness *in vitro***

164 Previous data suggested that phenolic esters of threonic acid are the most likely intermediates in  
 165 the *P. patens* phenylpropanoid pathway (Renault et al., 2017). Accordingly, we hypothesized that  
 166 PpHCT generates *p*-coumaroyl-threonate from *p*-coumaroyl-CoA and L-threonic acid, and we tested  
 167 this with *in vitro* assays using recombinant PpHCT expressed in *Escherichia coli*. We observed that  
 168 PpHCT produced mainly *p*-coumaroyl-4-threonate and a minor amount of *p*-coumaroyl-2-threonate  
 169 *in vitro*, pointing to a substantial regioselectivity (**Fig. 3A-B**). We then tested shikimic acid and quinic  
 170 acids as acyl acceptors, since they are native and accepted substrates of tracheophyte HCTs,  
 171 respectively (Hoffmann et al., 2003; Chiang et al., 2018). PpHCT catalyzed the transfer of *p*-  
 172 coumarate from *p*-coumaroyl-CoA to both of them (**Fig. 3A**). A strong regioselectivity favored the 5-  
 173 position for shikimate and quinate acylation (**Fig. 3A-B**).

174 We then investigated PpHCT acyl-CoA donor preference using end-point enzyme assays,  
 175 testing all pairwise combinations of the donors *p*-coumaroyl-CoA, caffeoyl-CoA and feruloyl-CoA  
 176 with the acceptors threonate, shikimate and quinate. As shown in **Figure 3C**, PpHCT used all three  
 177 acyl donors when shikimate was the acceptor, and the highest activity was observed with the

178 combination of shikimate and feruloyl-CoA. PpHCT thus displayed significant donor and acceptor  
 179 permissiveness. This was more pronounced with *p*-coumaroyl-CoA, the *P. patens* native acyl donor,  
 180 which in addition was the only donor that coupled with threonate (Fig. 3C).

181 A striking difference between PpHCT and orthologs from vascular plants is the presence of a  
 182 144-amino acid flexible loop joining the two main folded domains of the protein (Fig. S3). To test the  
 183 impact of this loop on enzyme activity, a truncated version of PpHCT lacking the internal loop  
 184 domain was produced in *E. coli* (Fig. S4). The truncation did not affect substrate preference;  
 185 however, it caused a minor decrease in activity with threonate as the acceptor, without altering the  
 186 shikimate and quinate acylation activity (Fig. S4).

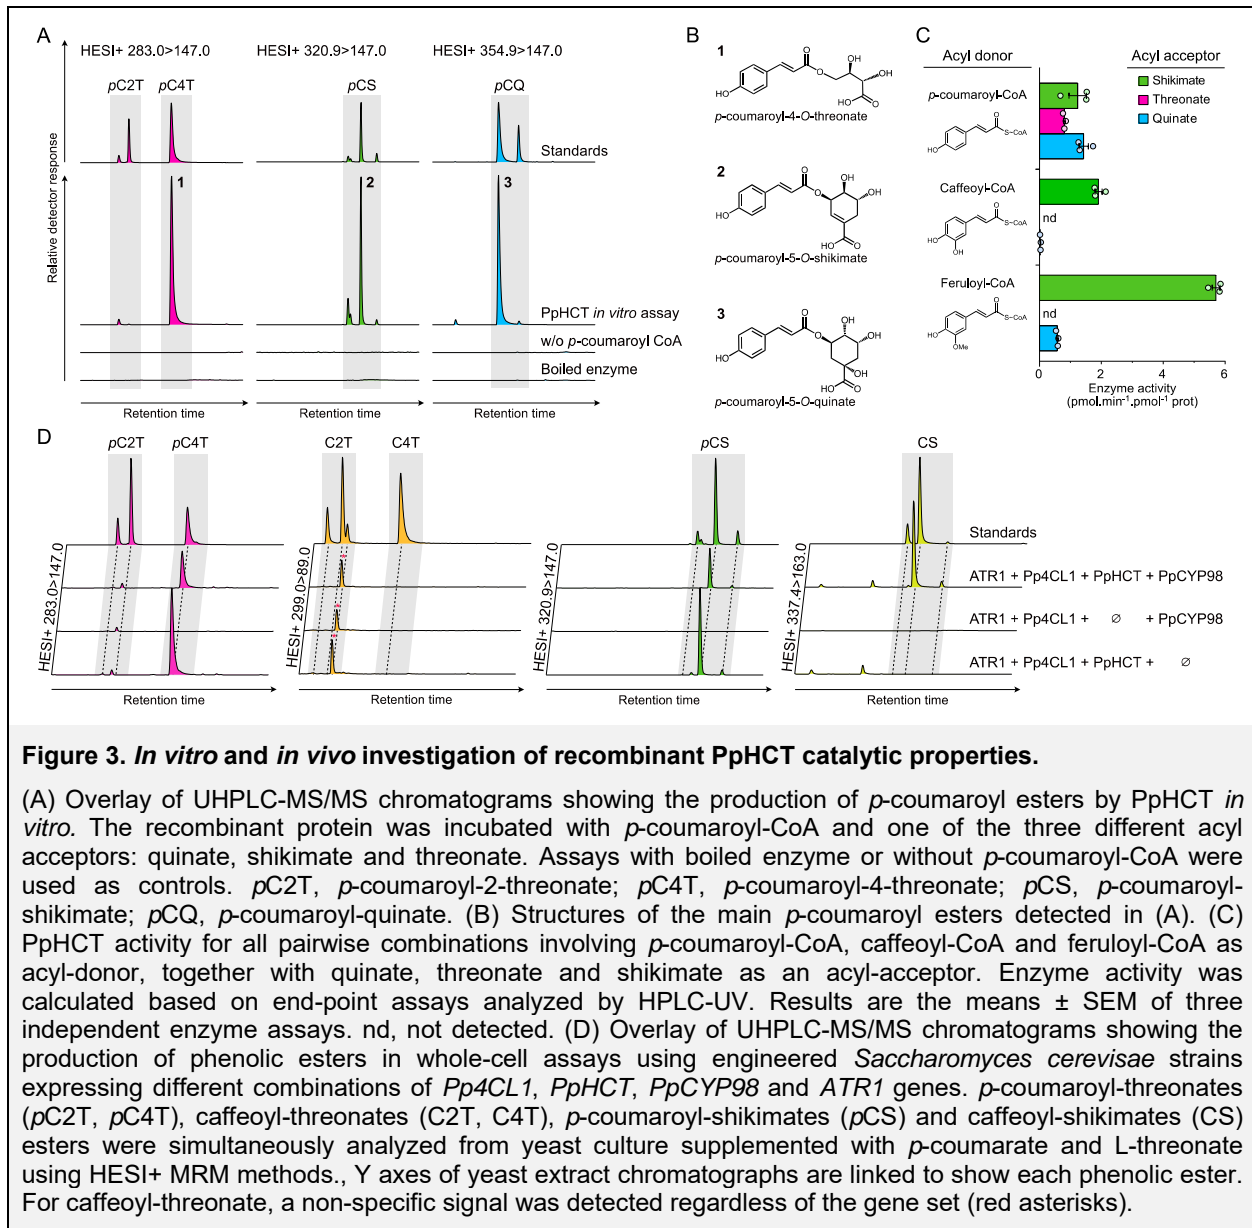

187

### 188 PpHCT kinetic parameters largely favor shikimate acylation

189 To gain deeper insights into PpHCT catalytic properties, enzyme kinetic parameters were  
 190 determined from activity saturation curves and Michaelis-Menten nonlinear regression (Fig. S5). We

191 focused the kinetic analysis on the three acyl acceptors, threonate, quinate and shikimate, and on  
 192 the native acyl donor *p*-coumaroyl-CoA. The results, summarized in **Table 1**, revealed an obvious  
 193 preference of PpHCT for shikimate as an acyl acceptor, in terms of affinity ( $K_m$ : 0.22 mM) and  
 194 velocity ( $k_{cat}$ : 5.1 s<sup>-1</sup>), compared with threonate ( $K_m$ : 17.2 mM,  $k_{cat}$ : 0.16 s<sup>-1</sup>). The calculated catalytic  
 195 efficiency with shikimate ( $k_{cat}/K_m$ ) was ~2,500-fold higher than with threonate (**Tab. 1**). PpHCT  
 196 activity with quinate was mixed, exhibiting low affinity ( $K_m$ : 9.4 mM) but a rather high velocity ( $k_{cat}$ :  
 197 3.5 s<sup>-1</sup>). PpHCT affinity for *p*-coumaroyl-CoA was 60 μM when shikimate was used as acceptor, a  
 198 value 7-times lower than when threonate was used as an acceptor (**Tab. 1**).

**Table 1. Summary of PpHCT kinetic parameters.** Enzyme affinity ( $K_m$ ) and velocity ( $k_{cat}$ ) constants were determined from PpHCT activity saturation curves, based on nonlinear Michaelis-Menten regression (see **Methods and Fig. S5**). Results are the means of three independent enzyme reactions; 95% confidence intervals (profile likelihood) are provided within brackets.

| Substrates              |                         | $K_m$ (mM)       | $k_{cat}$ (s <sup>-1</sup> ) | $k_{cat}/K_m$ (s <sup>-1</sup> .M <sup>-1</sup> ) |
|-------------------------|-------------------------|------------------|------------------------------|---------------------------------------------------|
| Fixed                   | Variable                |                  |                              |                                                   |
| <i>p</i> -coumaroyl-CoA | Threonate               | 17.2 (14.9-19.9) | 0.16 (0.15-0.17)             | 9                                                 |
|                         | Shikimate               | 0.22 (0.17-0.29) | 5.1 (4.8-5.4)                | 23 005                                            |
|                         | Quinate                 | 9.4 (6.7-13.7)   | 3.5 (3.0-4.2)                | 368                                               |
| Threonate               | <i>p</i> -coumaroyl-CoA | 0.43 (0.27-0.76) | 0.18 (0.14-0.25)             | 407                                               |
| Shikimate               | <i>p</i> -coumaroyl-CoA | 0.06 (0.03-0.10) | 17.0 (14.1-20.7)             | 283 333                                           |

199

## 200 Reconstitution of the moss phenolic pathway in yeast

201 The *in vivo* functionality of PpHCT and its ability to operate with potential partner enzymes were  
 202 investigated in metabolically engineered *Saccharomyces cerevisiae* co-expressing *Pp4CL1*,  
 203 *PpHCT*, and *PpCYP98*, as well as *Arabidopsis thaliana* *ATR1* (*At4g24520*) encoding a P450  
 204 reductase to ensure sufficient electron supply to PpCYP98 (Urban et al., 1997). Since *S. cerevisiae*  
 205 does not naturally synthesize phenylpropanoids or threonate, we supplemented the yeast culture  
 206 media with *p*-coumarate and L-threonate 6h after the onset of galactose-induced recombinant  
 207 protein production. UHPLC-MS/MS analysis of yeast culture extracts revealed the production of *p*-  
 208 coumaroyl-4-threonate but not *p*-coumaroyl-2-threonate (**Fig. 3D**), consistent with PpHCT having a  
 209 strong regiospecificity. Notably, caffeoyl-threonate was not detected in the yeast culture extracts  
 210 (**Fig. 3D**). *S. cerevisiae* synthesizes shikimate as an intermediate of aromatic amino acid  
 211 biosynthesis and, accordingly, we detected *p*-coumaroyl-shikimate in extracts of all *PpHCT*-  
 212 expressing yeast strains (**Fig. 3D**), which confirmed PpHCT promiscuity *in vivo*. Caffeoyl-shikimate  
 213 was readily detected in the yeast extracts, indicating that shikimate esters were intermediates  
 214 allowing an effective coupling of PpHCT and PpCYP98 activities (**Fig. 3D**). The major *p*-coumaroyl  
 215 ester isomers produced in yeast were similar to those predominantly generated by PpHCT *in vitro*  
 216 (**Fig. 3B**).

217 In parallel, we used the yeast platform to assess the catalytic activity of the *K. nitens* HCT  
 218 homolog kfl00513\_0110 (see **Fig. 1**), and found that it did not lead to the production of any



219 detectable *p*-coumaroyl-shikimate when co-expressed with *Pp4CL1*, *PpCYP98* and *ATR1* (**Fig. S6**).  
220 This supports the idea that charophyte HCT homologous proteins do not act as canonical HCT  
221 enzymes.

222

### 223 **PpHCT produces *p*-coumaroyl-shikimate *in planta* as a precursor of caffeate derivatives**

224 Next, we generated four independent *PpHCT* deletion mutants ( $\Delta PpHCT$ ) via homologous  
225 recombination (**Fig. 4A**, **Fig. S7**) in order to address the *in planta* function of *PpHCT*. The four  
226  $\Delta PpHCT$  lines lacked full length *PpHCT* transcripts (**Fig. 4B**), leading to a complete abolishment of  
227 HCT activity in gametophore protein extracts (**Fig. 4C**). The  $\Delta PpHCT$  lines phenocopied previously  
228 reported  $\Delta PpCYP98$  mutants (Renault et al., 2017), characterized by defective gametophore  
229 development (**Fig. 4D-F**, **Fig. S7**). UV-fingerprinting of gametophore metabolite extracts revealed  
230 the absence of major peaks in  $\Delta PpHCT$  mutant chromatogram (**Fig. 4G**). This low-resolution UV  
231 analysis was refined by targeted UHPLC-MS/MS analysis, which revealed both qualitative and  
232 quantitative differences in threonate esters. As expected, if PpHCT generates the substrate(s) of  
233 PpCYP98, caffeoyl-threonates were totally absent from  $\Delta PpHCT$  (**Fig. 4H**). Unexpectedly, however,  
234 levels of *p*-coumaroyl-threonate esters were higher in the  $\Delta PpHCT$  lines (**Fig. 4H**). Taken together,  
235 these data suggest that *p*-coumaroyl-threonate esters: (i) are not derived from PpHCT activity,  
236 implying the existence of another dedicated enzyme in *P. patens*; and (ii) are not the native  
237 substrates of PpCYP98, although they could be metabolized *in vitro* (Renault et al., 2017). We  
238 addressed the identity of this putative enzyme by testing the ability of each of the twelve full-length,  
239 expressed BAHD proteins from *P. patens* to catalyze the formation of *p*-coumaroyl-threonate in  
240 yeast. Only PpHCT was found to catalyze threonate acylation (**Fig. S8**).

241 Next, to investigate the existence of potentially overlooked hydroxycinnamoyl intermediates,  
242 and in particular caffeoyl conjugates, gametophore extracts were submitted to acid hydrolysis to  
243 release hydroxycinnamate moieties prior to UHPLC-MS/MS analysis. Caffeate was not detected in  
244 mutant gametophore hydrolyzed extracts (**Fig. 4I**), confirming that PpHCT is essential in the  
245 production of caffeate derivatives in *P. patens*. A large increase in the amount of *p*-coumarate in  
246 hydrolyzed extracts (**Fig. 4I**) was consistent with the previously reported accumulation of *p*-  
247 coumaroyl-threonates in  $\Delta PpHCT$  mutant lines (**Fig. 4H**). Taking advantage of the increased  
248 sensitivity and resolution provided by a UHPLC-MS/MS, we searched for shikimate esters in  
249 gametophore extracts in which we had not detected these compounds previously (Renault et al.,  
250 2017). To improve the detection threshold, extracts were also concentrated five-fold and under  
251 these conditions we detected *p*-coumaroyl-5-*O*-shikimate in gametophore extracts from wild-type *P.*  
252 *patens* (**Fig. 4J**), but not in those from  $\Delta PpHCT$  (**Fig. 4J**). The results were orthogonally validated  
253 by both retention time comparison with molecular standards and two different mass transitions in  
254 positive and negative modes (signal-to-noise ratio > 80). *p*-coumaroyl-5-*O*-shikimate was absent in  
255 extracts from all four  $\Delta PpHCT$  lines (**Fig. 4K**). Taken together, the metabolic analysis of the  
256  $\Delta PpHCT$  mutants thus confirmed a key function of HCT in the production of caffeate derivatives in

257 *P. patens* via the formation of a *p*-coumaroyl-5-O-shikimate intermediate, and did not support the  
 258 existence of alternative pathways.

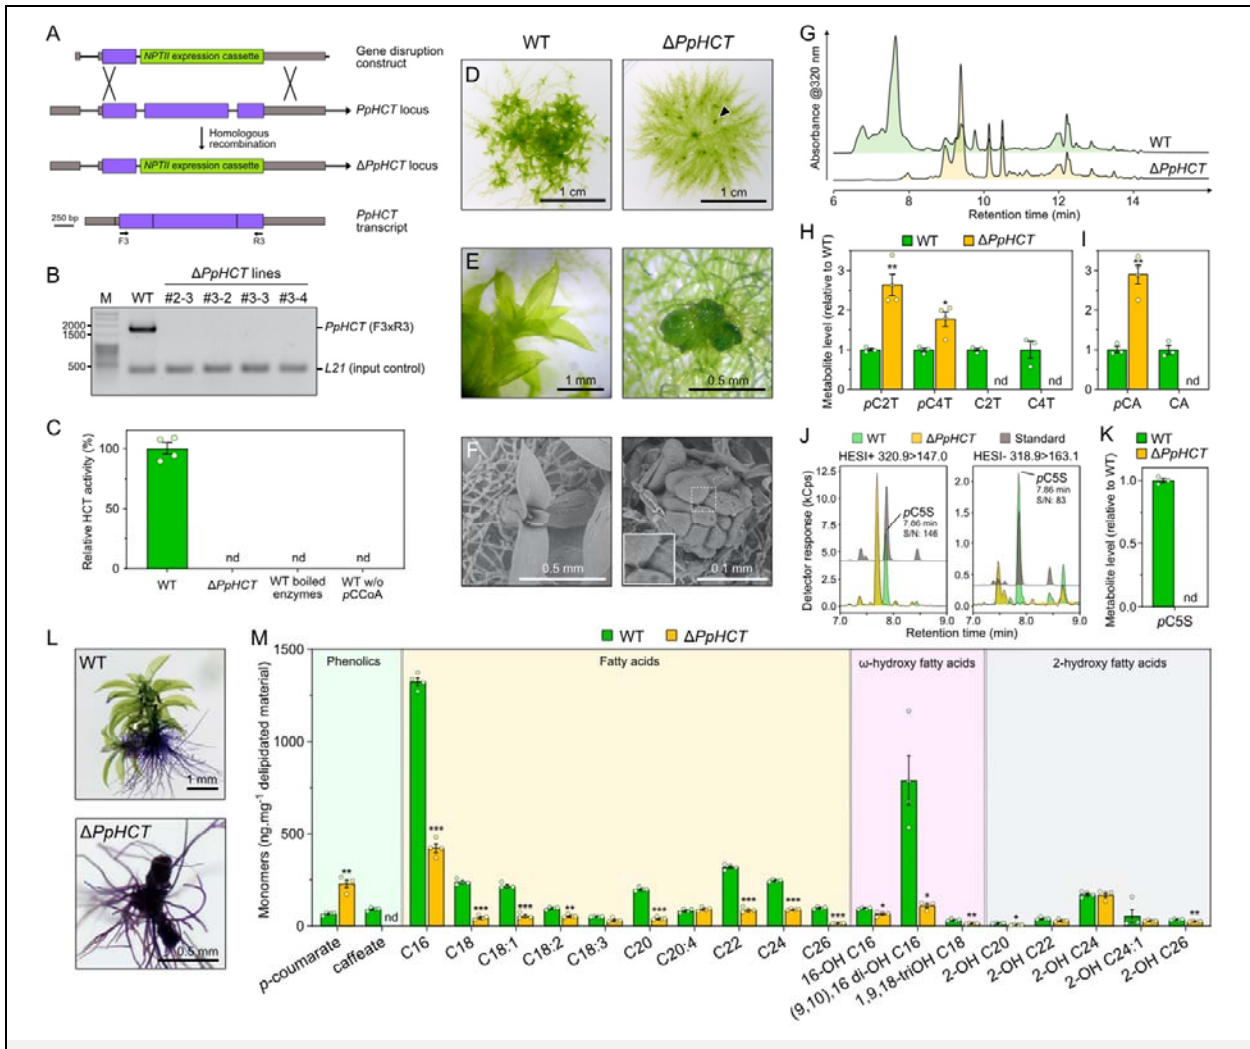

P<0.001.

259

### 260 ***PpHCT* deficiency impairs cuticle development**

261 A previous analysis of a  $\Delta PpCYP98$  mutant led us to conclude that the availability of caffeate, or a  
262 derivative, is required for normal *P. patens* gametophore development and cuticle formation  
263 (Renault et al, 2017). Since  $\Delta PpHCT$  lines essentially phenocopied  $\Delta PpCYP98$  at macroscopic and  
264 metabolic levels, we tested tissue surface permeability of mutant and WT gametophores using  
265 toluidine blue assay, to assess for similar cuticle defects. The strong blue staining of the  $\Delta PpHCT$   
266 lines confirmed their increased surface permeability compared to WT (**Fig. 4L, Fig. S7**), consistent  
267 with reduced cuticle barrier properties associated with the *PpHCT* deletion. We also characterized  
268 the monomeric composition of the cuticular biopolymer from the  $\Delta PpHCT$  gametophore and found  
269 differences in aliphatic or phenolic components compared with WT (**Fig. 4M**). The  $\Delta PpHCT$  cuticle  
270 appeared to be devoid of caffeate residues, but showed a 3-fold increase in *p*-coumarate units  
271 compared with WT, consistent with the analysis of soluble phenolic compounds (**Fig. 4H, I**). This  
272 change in phenolic composition was accompanied by a substantial decrease in long-chain fatty  
273 acids (LCFA) and  $\omega$ -hydroxylated LCFA, especially in the two most abundant monomers, palmitic  
274 acid (C16) and (9,10),16 di-hydroxypalmitic acid. A minor decrease in the total amounts of 2-OH-  
275 VLCFA (very-long chain fatty acids), derived from membrane sphingolipids (Molina et al., 2006),  
276 indicated that plasma membranes were only slightly affected, in contrast to the cuticular biopolymer  
277 (**Fig. 4M**).

278

### 279 **Conservation of HCT properties between bryophytes and angiosperms**

280 Functional analysis of PpHCT suggested a conservation of *HCT* function over the ~500 million  
281 years that span embryophyte evolution. To provide support to this hypothesis, we first investigated  
282 *in vitro* the acyl acceptor permissiveness of recombinant HCT from *M. polymorpha* (MpHCT), which  
283 belongs to another major bryophyte group, and *A. thaliana* (AtHCT) (**Fig. 5A**). In contrast to PpHCT  
284 and MpHCT, AtHCT activity using threonate as an acyl acceptor was barely detectable (**Fig. 5A**),  
285 suggesting that the ability to use threonate as a substrate is specific to bryophyte HCTs, and was  
286 lost later during evolution. However, all three proteins had in common a preference for shikimate or  
287 quinate as an acceptor, indicative of a degree of a conservation of HCT enzyme properties in  
288 embryophytes (**Fig. 5A**). To further assess the functional conservation of *HCT* genes across  
289 embryophyte evolution, we conducted transcomplementation experiments. The first step was to  
290 generate an *A. thaliana hct* null mutant since only RNA-interference lines, with residual HCT  
291 expression, were available. Following a CRISPR/Cas9-mediated strategy, we isolated a mutant  
292 allele characterized by a deletion of seven nucleotides in the *AtHCT* first exon, hereafter termed  
293 *hct*<sup>D7</sup> mutant (**Fig. 5B**), which introduces a frameshift leading to a premature stop codon.

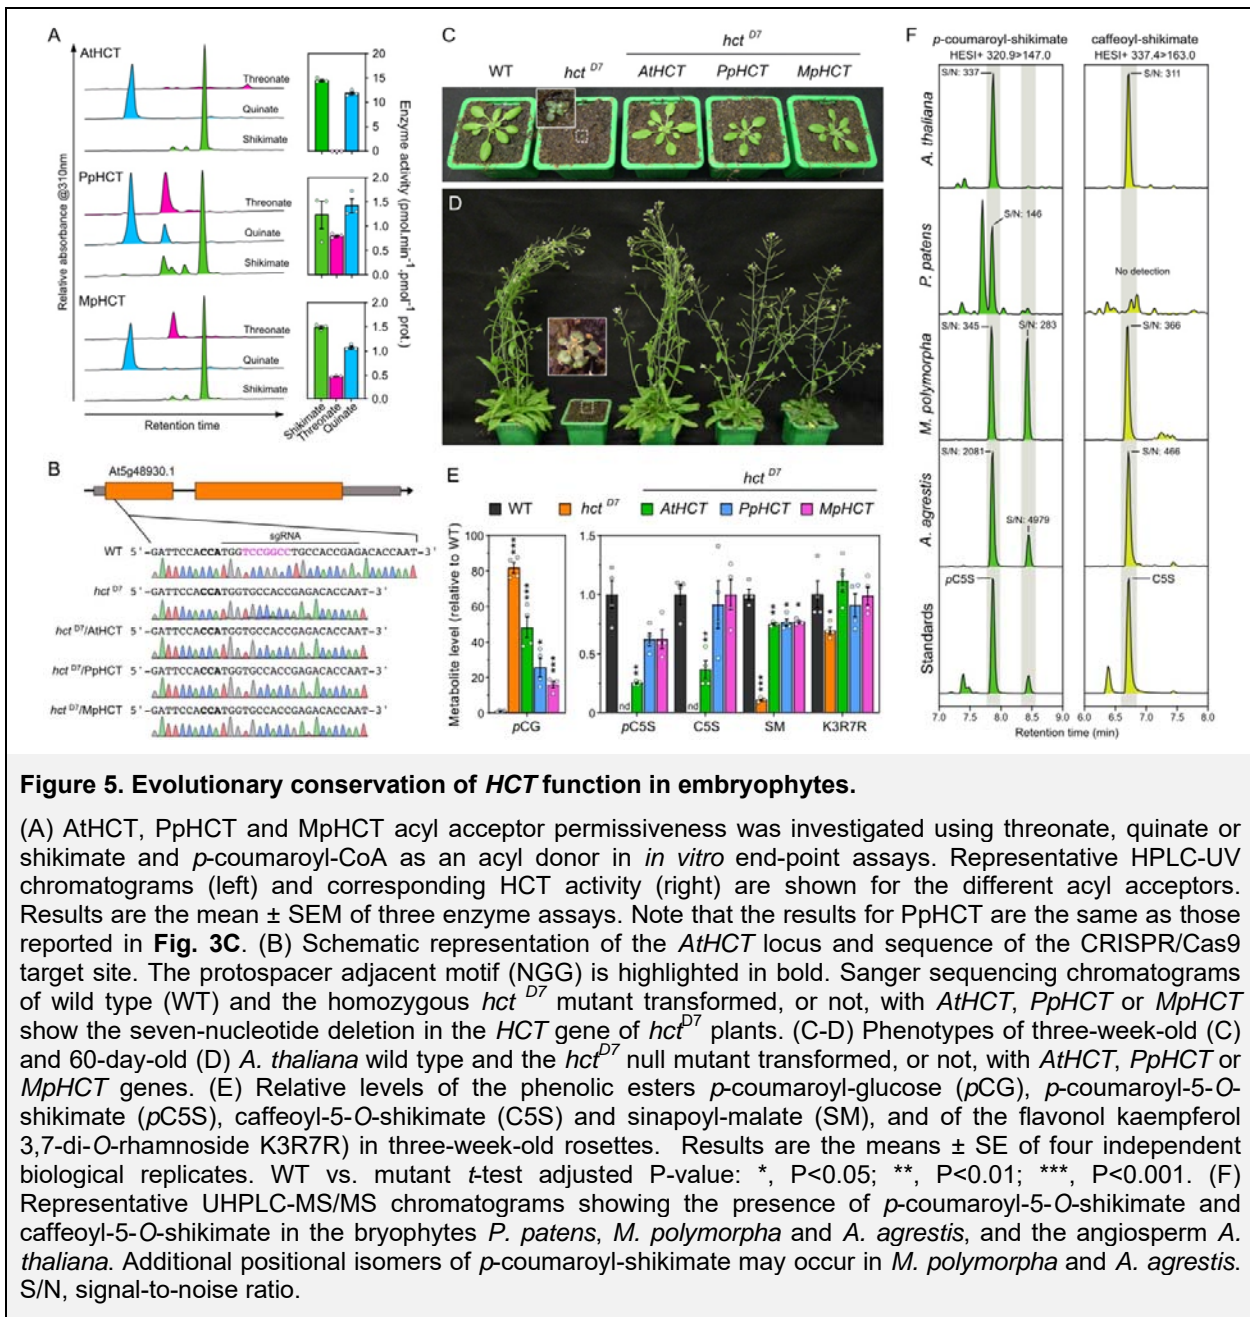

294

295 We then transformed heterozygous *hct<sup>D7/+</sup>* plants with *AtHCT*, *PpHCT* and *MpHCT* coding  
 296 sequences under control of the *A. thaliana C4H* promoter, and selected plants homozygous for both  
 297 *hct<sup>D7</sup>* allele and complementation constructs (**Fig. 5B**). The *AtHCT* null mutation led to reduced  
 298 growth (**Fig. 5C-D**), similar to previous observations of *HCT*-RNAi lines (Besseau et al., 2007; Li et  
 299 al., 2010a), but this abnormal phenotype was entirely abolished by introducing an *HCT* coding  
 300 sequence from *A. thaliana*, and almost completely in the case of *PpHCT* or *MpHCT* (**Fig. 5C-D**).  
 301 The *HCT* null mutation resulted in obvious changes in UV chromatograms (**Fig. S9**), which was  
 302 confirmed by targeted analysis of diagnostic phenylpropanoid molecules. The targeted profiling  
 303 revealed an 80-fold accumulation of *p*-coumaroyl-glucose in the *hct<sup>D7</sup>* mutant compared with WT,  
 304 while *p*-coumaroyl and caffeoyl esters of shikimate were absent from the mutant (**Fig. 5E**). Residual

305 levels of sinapoyl-malate, the main soluble phenolic ester in *A. thaliana* leaves, were detected in  
306 *hct<sup>D7</sup>* (~10% of WT levels), likely due to the alternative C3H pathway using free *p*-coumarate, or  
307 promiscuous activities of C3'H on accumulating *p*-coumaroyl esters (e.g. *p*-coumaroyl-glucose, **Fig.**  
308 **5F**). Levels of the main *A. thaliana* leaf flavonoid, the flavonol kaempferol 3,7-di-*O*-rhamnoside  
309 (kaempferitrin), were slightly reduced in *hct<sup>D7</sup>* compared with WT; a result that does not match data  
310 from previous analyses of RNAi-*HCT* lines (Besseau et al., 2007; Li et al., 2010a). However, HPLC-  
311 UV analysis indicated that no other phenylpropanoids, including flavonoids, over-accumulated to  
312 levels similar to sinapoyl-malate in the *hct<sup>D7</sup>* null mutant under our growth conditions (**Fig. S9**). All  
313 *hct<sup>D7</sup>* plant metabolic defects were, at least partially, complemented by transformation with *AtHCT*,  
314 *PpHCT* or *MpHCT* under the control of the *AtC4H* promoter (**Fig. 5E**). In particular, the ability to  
315 synthesize *p*-coumaroyl-5-*O*-shikimate and caffeoyl-5-*O*-shikimate was restored in all the *HCT*-  
316 complemented lines (**Fig. 5E**), consistent with functional conservation of bryophyte and angiosperm  
317 *HCT* genes.

318 To assess the conservation of phenolic shikimate esters as metabolic intermediates during  
319 embryophyte evolution, we checked for their presence in representative species of the three major  
320 bryophyte lineages. In addition to *P. patens* and *A. thaliana* (**Fig. 5E-F, Fig. S10**), targeted analysis  
321 revealed the presence of *p*-coumaroyl-5-*O*-shikimate in the liverwort *M. polymorpha* and the  
322 hornwort *A. agrestis* (**Fig. 5F, Fig. S10**). With the exception of *P. patens*, the 3'-hydroxylated form of  
323 *p*-coumaroyl-5-*O*-shikimate, caffeoyl-5-*O*-shikimate, was detected in all plant samples. The results  
324 were consistently confirmed by both retention time comparison with molecular standards and  
325 simultaneous MS/MS analysis in positive and negative modes (**Fig. 5F, Fig. S10**). Parallel profiling  
326 of threonate esters in the same plant extracts suggested a lineage-specific pattern, since they were  
327 detected only in *P. patens* extracts (**Fig. S11**).

328  
329

## 330 DISCUSSION

331 The silencing of *HYDROXYCINNAMOYL-CoA:SHIKIMATE HYDROXYCINNAMOYL*  
 332 *TRANSFERASE* in seed plants typically results in a strong reduction in the abundance, and/or  
 333 compositional modification, of the biopolymer lignin, and is usually associated with stunted growth  
 334 (Chen et al., 2006; Hoffmann et al., 2004; Wagner et al., 2007; Besseau et al., 2007; Gallego-  
 335 Giraldo et al., 2011). Parallel *in vitro* and structural studies showed that tracheophyte HCTs  
 336 consistently use shikimate as a preferred acyl acceptor to form *p*-coumaroyl-shikimate esters  
 337 (Hoffmann et al., 2003; Chiang et al., 2018; Levsh et al., 2016; Lallemand et al., 2012), which in turn  
 338 serve as substrates for C3'H enzymes (Schoch et al., 2003; Alber et al., 2019). Taken together,  
 339 these data suggested a deep evolutionary conservation of HCT function in vascular plants. Here,  
 340 through a multidisciplinary study of the bryophyte model *P. patens*, we are able to extend *HCT*  
 341 functional conservation throughout the entirety of embryophyte evolution, pointing to an emergence  
 342 in the last common ancestor of land plants, approximately 500 Ma (**Fig. 6**). New methodologies  
 343 have allowed us to refine our previous studies (Renault et al., 2017) and we conclude, based on  
 344 new evidence, that shikimate esters are the native intermediates for phenolic ring 3-hydroxylation in  
 345 *P. patens* (**Fig. 6**).

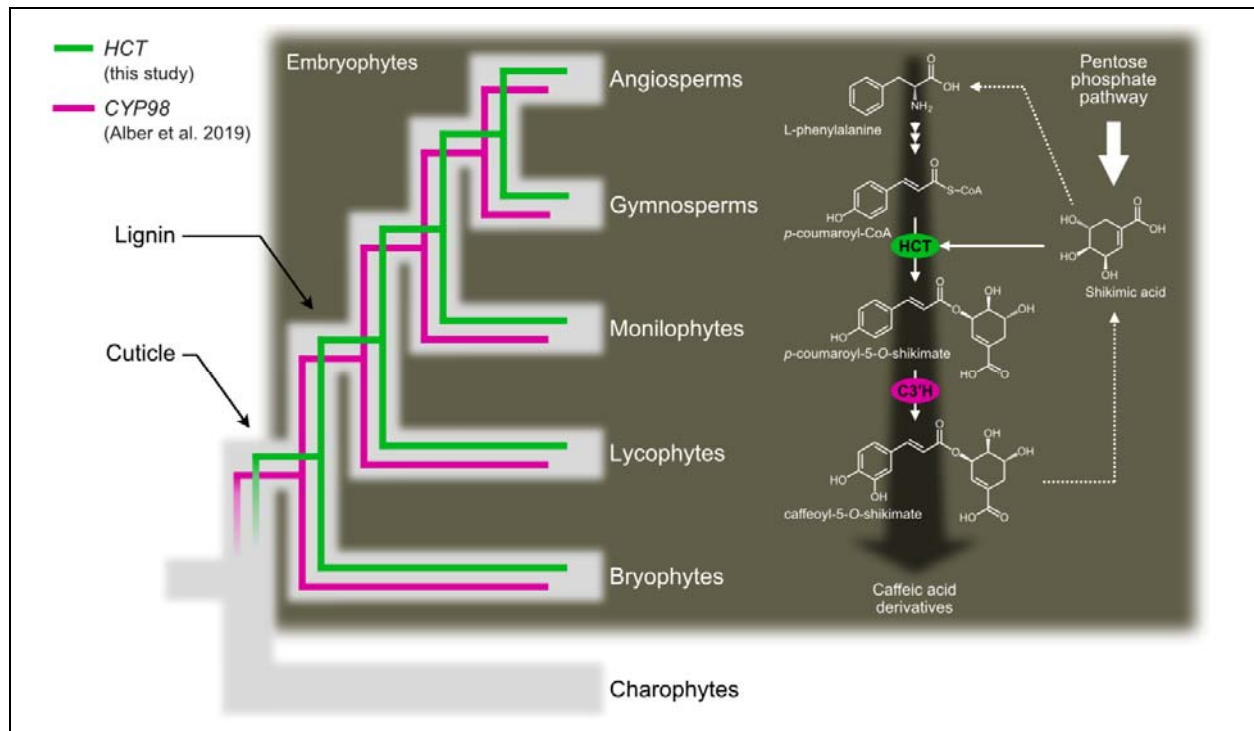

**Figure 6. Evolutionary model for the conservation of *HCT/CYP98* pair in embryophytes.**

Gray branches represent organismal evolution of species. Green and cyan branches represent *HCT* (this study) and *CYP98* (Alber et al., 2019) gene evolutions, respectively. *CYP98* encodes *p*-coumaroyl 3'-hydroxylase (C3'H). Shikimic acid, a precursor of aromatic amino acids deriving from the pentose phosphate pathway, is used to form shikimate esters intermediates, through the activity of *HCT* and C3'H enzymes that catalyze phenolic ring functionalization in embryophytes.

346

347 Our data also highlight a previously unappreciated complexity of the bryophyte  
 348 hydroxycinnamic acid pathway, which in *P. patens* produces both soluble esters and precursors of a

349 hydrophobic apoplastic biopolymer. This metabolic typology is akin to that of flowering plants, which  
350 often produce lineage-specific soluble phenolic esters (e.g. sinapoyl-malate or chlorogenic acids),  
351 as well as essential precursors of biopolymers, such as monolignols. Soluble esters act as UV  
352 screens and antioxidants (Lehfeldt et al., 2000; Clé et al., 2008) and, as such, may be  
353 advantageous in particular ecological niches (Li et al., 2010b). We propose that threonate esters,  
354 which we found only in *P. patens*, are specialized stress-mitigating molecules, while the shikimate  
355 esters are evolutionarily conserved intermediates involved in phenolic ring functionalization.  
356 Threonic acid originates from the degradation of ascorbate (Green and Fry, 2005), a plant-specific  
357 antioxidant, indicating a connection between *P. patens* threonate ester biosynthesis and stress  
358 acclimation. On the other hand, evolutionary selection has led to the coupling of phenol-containing  
359 biopolymer biosynthesis with shikimic acid, a widespread molecule found in plants, bacteria and  
360 fungi. In plants, shikimic acid is derived from the pentose phosphate pathway (Herrmann and  
361 Weaver, 1999) (**Fig. 6**), which provides land plants with a feedback loop mechanism to regulate  
362 photosynthetic carbon allocation to biopolymer production.

363 We here provide evidence that the *HCT* gene appeared during plant terrestrialization in the  
364 last common ancestor of embryophytes, concomitant with the occurrence of a cuticle, but prior to  
365 lignin evolution (**Fig. 6**). This evolutionary pattern matches that of *CYP98*, which encodes the  
366 downstream C3'H enzyme (Alber et al., 2019). A complex evolutionary interplay therefore likely  
367 shaped *HCT* and *CYP98* macro-evolutions and established the *HCT/CYP98* pairing as a core  
368 metabolic module within the hydroxycinnamic acid pathway, deeply rooted into land plant evolution  
369 (**Fig. 6**). The tight relationships between the two enzymes is further evidenced by their ability to  
370 physically interact and to form a supramolecular complex in *A. thaliana*, which improves substrate  
371 channeling (Bassard et al., 2012). Whether the hydroxycinnamic acid pathway in *P. patens* is  
372 organized at a supramolecular level remains an open question. The *CYP98/HCT* pair also features  
373 micro-evolutionary patterns, as illustrated by recurrent, independent duplications of the core *HCT*  
374 and *CYP98* genes, which led to the emergence of specialized phenolic compounds, such as  
375 chlorogenic acids, rosmarinic acid and phenolamides (Matsuno et al., 2009; Liu et al., 2016; Levsh  
376 et al., 2019).

377 Both *PpHCT* and *PpCYP98* knock-out mutants (Renault et al., 2017) show stunted  
378 gametophore growth and organ fusion phenotypes, associated with a complete loss of cuticular  
379 caffeate units. Cuticles are essential to control water permeability, and provide plant protection  
380 against drought (Lü et al., 2012; Kosma et al., 2009) and other environmental stresses, including  
381 UV-B radiation (Krauss et al., 1997; Yeats and Rose, 2013). Thus, emergence of a cuticle with  
382 properties that enabled plant terrestrialization may have been dependent on the presence of a  
383 primordial hydroxycinnamic pathway. The severe developmental defects of the  $\Delta PpHCT$  and  
384  $\Delta PpCYP98$  mutants prevent meaningful evaluation of their stress tolerance. Although found in  
385 substantial amounts in the cuticle of some tracheophytes, such as the leaf cuticle of *Solanum*  
386 *lycopersicum* (Bolger et al., 2014), hydroxycinnamic acids are usually in small proportions of the  
387 cuticle of vascular plants (Fich et al., 2016). The presence of large amounts of hydroxycinnamic

388 acids might therefore be a typical, and possibly essential, feature of bryophyte lineages (Caldicott  
389 and Eglinton, 1976; Buda et al., 2013), a hypothesis that could be tested by sampling a larger  
390 diversity of embryophyte species. Hydroxycinnamic acids, although minor components of the plant  
391 cuticle, might play an important role, since they are covalently attached to fatty acid monomers  
392 (Riley and Kolattukudy, 1975). We show here that the absence of caffeate in *P. patens* prevents the  
393 formation of the cuticle and cuticular biopolymer polymerization, as evidenced by the large  
394 decreases in the major cutin monomers C16 FA and (9,10),16 di-OH C16 FA in the  $\Delta PpHCT$  lines,  
395 as was previously shown in the *PpCYP98* deletion mutants (Renault et al., 2017). A straightforward  
396 interpretation is that caffeate anchors or shapes the cuticle lipidic scaffold of *P. patens*. Such a  
397 function is apparently not fulfilled by *p*-coumarate, which accumulates in the  $\Delta PpHCT$  cuticle. This  
398 might indicate an important role for precursor phenolic ring functionalization, possibly by expanding  
399 regiochemistry, as is the case in natural plant lignins, which are predominantly derived from di- or  
400 tri-substituted phenolic ring precursors (Ralph et al., 2019). A structural function for phenolic  
401 compounds in the cuticle may be specific to bryophytes, or even *P. patens*, since it was reported  
402 that the absence of ferulate from *A. thaliana* cuticles did not noticeably reduce cuticle integrity  
403 (Rautengarten et al., 2012). The enrichment of the *P. patens* cuticle with phenolic compounds  
404 potentially contributes various functional attributes, including UV protection, water/gas management,  
405 tissue scaffolding for erect growth and organ determination (i.e. organ fusion avoidance). We  
406 hypothesize that reduction of this bryophyte property was linked to the emergence of new,  
407 specialized biopolymers in tracheophytes, such as canonical lignin and suberin, which assumed  
408 some of the functions mediated by the phenol-enriched cuticle of bryophytes.  
409  
410



## 411 **METHODS**

### 412 **Phylogenetic analysis**

413 All BAHD sequences from *Physcomitrium* (*Physcomitrella*) *patens* (moss, bryophyte), *Marchantia*  
414 *polymorpha* (liverwort, bryophyte), *Anthoceros agrestis* (hornwort, bryophyte), *Spirogloea muscicola*  
415 (*Zygnematophyceae*, charophyte), *Chara braunii* (*Charophyceae*, charophyte) and *Klebsormidium*  
416 *nitens* (*Klebsormidiophyceae*, charophyte) were retrieved by BLASTp search using AtHCT  
417 (At5g48930.1) as query (E-value<0.01). Truncated proteins with less than 420 residues were  
418 discarded. Obtained bryophyte and charophyte BAHDs were aligned with 34 functionally  
419 characterized BAHD protein (full list in **Tab. S1**) using the MUSCLE algorithm (Edgar, 2004)  
420 (alignment file available as **Dataset S1**). Ambiguous sites of the alignment were masked applying  
421 the Gblocks method (Castresana, 2000). Phylogenetic relationships were reconstructed with a  
422 maximum-likelihood approach using the PhyML3.0 (Guindon et al., 2010). Selection of evolution  
423 model that best fits the dataset was guided by the SMS software; the tree was ultimately inferred  
424 from the LG +G+I+F model (Le and Gascuel, 2008). Initial tree(s) for the heuristic search were  
425 obtained automatically by applying the BioNJ algorithm, and by selecting the topology with superior  
426 log likelihood value. Best of nearest neighbor interchange (NNI) and subtree pruning and regrafting  
427 (SPR) methods were used for improving the tree. Branch tree supports were calculated with the  
428 approximate likelihood ratio test (Anisimova and Gascuel, 2006). Sequence manipulation was  
429 performed with Seaview 4 software (<http://pbil.univ-lyon1.fr/>) and phylogenetic analysis on PhyML  
430 server (<http://www.atgc-montpellier.fr/phyml/>).

431

### 432 **Homology modeling of proteins**

433 3D models of *P. patens* (Pp3c2\_29140), *K. nitens* (kfl00513\_0110) and *C. braunii*  
434 (CHBRA170g00210) proteins were generated using the Modeler comparative module (Sali and  
435 Blundell, 1993) embedded in ChimeraX v1.0 software (Goddard et al., 2018) using *A. thaliana* HCT  
436 in complex with *p*-coumaroyl-5-O-shikimate (pdb entry: 5kju) as template. Prior to modeling, target  
437 proteins were aligned with embryophyte representative HCTs visible in **Fig. 1B** with MUSCLE  
438 algorithm (alignment file available as **Dataset S2**). Five models were automatically generated for  
439 each target proteins; 3D models with the best GA341 and zDOPE scores were kept for subsequent  
440 analyses. Potential hydrogen bonds linking protein residues and *p*-coumaroyl-5-O-shikimate were  
441 predicted with the ChimeraX *FindHBond* tool. Overlay and visualization of 3D protein models was  
442 performed with ChimeraX.

443

### 444 **Plant growth conditions**

445 *Physcomitrella patens* (Hedw.) Bruch & Schimp., strain Gransden (IMSC acc. no. 40001, (Lang et  
446 al., 2018) was cultured in liquid or on solid Knop medium (Reski and Abel, 1985) supplemented with  
447 50 mmol.L<sup>-1</sup> H<sub>3</sub>BO<sub>3</sub>, 50 mmol.L<sup>-1</sup> MnSO<sub>4</sub>, 15 mmol.L<sup>-1</sup> ZnSO<sub>4</sub>, 2.5 mmol.L<sup>-1</sup> KI, 0.5 mmol.L<sup>-1</sup>  
448 Na<sub>2</sub>MoO<sub>4</sub>, 0.05 mmol.L<sup>-1</sup> CuSO<sub>4</sub> and 0.05 mmol.L<sup>-1</sup> CoCl<sub>2</sub>. Medium was solidified with 12 g.L<sup>-1</sup>  
449 purified agar. *P. patens* gametophores were propagated on agar plates or in liquid cultures

450 established by soft tissue disruption (~15 s). Liquid cultures were weekly subcultured and kept  
451 under constant agitation (130 rpm) for proper aeration. *Marchantia polymorpha* Tak-1 accession  
452 and *Anthoceros agrestis* Oxford accession were grown on half-strength Gamborg B5 medium  
453 solidified with 1.2% agar. Bryophytes were kept at 23°C under 16/8 h day/night cycle, light intensity  
454 set to 70  $\mu\text{mol}\cdot\text{m}^{-2}\cdot\text{s}^{-1}$ . *Arabidopsis thaliana* (Col-0 wild-type genetic background) plants were grown  
455 on soil, kept under 22/18°C, 16h/8h light/dark regime (100  $\mu\text{mol}\cdot\text{m}^{-2}\cdot\text{s}^{-1}$  light intensity) and were  
456 watered from the bottom every two days with tap water.

457

#### 458 **Determination of gene expression by qRT-PCR**

459 Total RNA was isolated from 10 mg of lyophilized tissue with 1 ml of TriReagent (Sigma-Aldrich).  
460 Samples were agitated 5 minutes at room temperature prior to centrifugation at 13,000 *g*, RT. After  
461 transfer of the supernatant to a new microtube, an equal volume of chloroform was added and  
462 samples were thoroughly vortexed and centrifuged at 13,000 *g* at RT to induce phase separation.  
463 The clear upper phase was recovered and transferred to a new microtube, total RNA was  
464 precipitated by adding 0.1 volume of sodium acetate (NaOAc, 3M, pH 5.2) and 2.5 volumes of  
465 absolute ethanol. After incubation at -20°C for 2h, RNA was spin down by centrifugation at 13,000  
466 *g*, 4°C. Supernatant were discarded, the RNA pellet was washed with 1 ml of 70% ethanol, then  
467 dried at RT for 10 minutes. Total RNA was finally resuspended in DEPC-treated water. Twenty  
468 micrograms of RNA were treated with 5U of RQ1 DNaseI (Promega) and subsequently purified  
469 using phenol-chloroform (50/50, v/v) and precipitation by NaOAc/EtOH. One microgram of DNaseI-  
470 treated RNA was reverse-transcribed with oligo(dT) and the Superscript III enzyme (Thermo  
471 Scientific) in 20  $\mu\text{l}$  reaction. Quantitative PCR reactions consisted of 10 ng cDNA, 500 nM of each  
472 primers and 5  $\mu\text{l}$  of 2X LightCycler<sup>®</sup> 480 SYBR Green I Master mix (Roche) in 10  $\mu\text{l}$  final volume.  
473 Reactions were run in triplicates on a LightCycler<sup>®</sup> 480 II device (Roche). The amplification program  
474 was 95 °C for 10 min and 40 cycles (95 °C denaturation for 10 s, annealing at 60 °C for 15 s,  
475 extension at 72 °C for 15 s), followed by a melting curve analysis from 55 to 95 °C to check for  
476 transcripts specificity. Crossing points (Cp) were determined using the manufacturer's software. Cp  
477 values were corrected according to primer pair PCR efficiency computed with the LinReg PCR  
478 method (Ruijter et al., 2009). *Pp3c19\_1800* and *Pp3c27\_3270* genes were used as internal  
479 reference for expression normalization. List of qPCR primers is available in **Table S2**.

480

#### 481 **GUS staining**

482 Plant tissues were vacuum infiltrated during 10 min with X-Gluc solution (containing 50 mM  
483 potassium phosphate buffer pH 7.0, 0.5 mM ferrocyanide, 0.5 mM ferricyanide, 0.1% Triton X-100  
484 1mM supplemented with 0.5 mg/mL X-Gluc) and incubated at 37 °C for 4.5 h. Chlorophyll was  
485 removed by washing tissues three times in 70% ethanol.

486

#### 487 **Recombinant protein production**

488 Cloning of AtHCT (*At5g48930*) coding sequence into the pGEX-KG vector and purification of the  
489 corresponding recombinant protein were performed as previously described (Hoffmann et al., 2003;  
490 Besseau et al., 2007). Coding sequences of PpHCT (*Pp3c2\_29140*), MpHCT (*Mapoly0003s0277*)  
491 were PCR-amplified from *P. patens* Gransden and *M. polymorpha* Tak-1 cDNA respectively using  
492 Gateway-compatible primers (Tab. S2). The truncated PpHCT coding sequence, visible in Fig. S4A,  
493 was ordered as double-stranded gBlock (Integrated DNA Technologies) with Gateway compatible  
494 extensions. CDS were cloned into pDONR207 vector by BP Clonase reaction, then shuttled to the  
495 pHGWA expression vector by LR clonase reaction, allowing N-terminal fusion of protein with  
496 hexahistidine tag. *Escherichia coli* Rosetta2pLyS strain was transformed with recombined pHGWA  
497 plasmids and cultivated in ZYP-5052 autoinducible medium. Recombinant proteins were purified by  
498 immobilized metal affinity chromatography (IMAC) using an AKTA Pure 25 system equipped with  
499 HisTrap HP 1 mL column and submitted to gel filtration using a Superdex 200 increase 10/300 GL  
500 column (GE healthcare). Purified recombinant proteins were conserved at -80°C in 1x PBS solution  
501 containing 10% glycerol.

502

### 503 ***In vitro* enzyme assays**

504 Five millimolar stock solutions of *p*-coumaroyl-CoA, caffeoyl-CoA and feruloyl-CoA (Transmit) were  
505 prepared in H<sub>2</sub>O. Eighty millimolar stock solution of L-threonic acid was prepared from its  
506 hemicalcium salt (Sigma-Aldrich) in H<sub>2</sub>O containing 40 mM EDTA to chelate calcium and improve  
507 solubility. Forty millimolar stock solutions of shikimate and D-quinic acid (Sigma-Aldrich) were  
508 prepared in H<sub>2</sub>O. For end-point experiments, *in vitro* HCT assays were performed in 100 µL of 50  
509 mM potassium phosphate buffer pH 7.4 containing 5 µg recombinant PpHCT protein, 1 mM  
510 dithiothreitol, 5 mM acyl-acceptor (shikimate, quinate or threonate) and 200 µM acyl-CoA (*p*-  
511 coumaroyl-CoA, caffeoyl-CoA or feruloyl-CoA). Reactions were initiated by addition of the acyl-CoA,  
512 incubated at 30°C for 25 minutes and stopped by addition of 100 µL acetonitrile. To determine  
513 PpHCT kinetic parameters, same assay composition was used except that substrate and enzyme  
514 concentrations were optimized for each tested substrate. For shikimate, 50 ng protein, 200 µM *p*-  
515 coumaroyl-CoA and 0.125-8 mM shikimate were used. For quinate, 100 ng protein, 200 µM *p*-  
516 coumaroyl-CoA and 0.312-20 mM D-quinic acid were used. For threonate, 2 µg protein, 200 µM *p*-  
517 coumaroyl-CoA and 4-32 mM L-threonate were used. For *p*-coumaroyl-CoA, 50 ng protein, 8 mM  
518 shikimate and 12.5-400 µM *p*-coumaroyl-CoA, or 2 µg protein, 32 mM L-threonate and 12.5-600 µM  
519 *p*-coumaroyl-CoA were used. Reactions were initiated by addition of the saturating substrate,  
520 incubated at 30°C for 10 minutes and stopped by addition of 100 µL acetonitrile. Relative  
521 quantification of reaction products was performed by UHPLC-MS/MS. Absolute quantification of  
522 phenolic esters was performed on HPLC-UV with external calibration curves of corresponding free  
523 hydroxycinnamic acid (i.e. *p*-coumarate, caffeate and ferulate). Kinetic parameters were calculated  
524 with nonlinear Michealis-Menten regression using the GraphPad Prism v4.8 software (Fig. S5).

525

### 526 **Yeast metabolic engineering**

527 For *P. patens* phenolic pathway reconstitution, *Pp4CL1*, *PpHCT*, and *PpCYP98* coding sequences  
528 were PCR-amplified from Gransden cDNA using Gateway-compatible primers (Tab. S2) and  
529 shuttled by gateway cloning to yeast galactose-inducible expression vectors pAG424GAL,  
530 pAG423GAL and pAG425GAL (Alberti et al., 2007), respectively; *A. thaliana* *ATR1* coding  
531 sequence was PCR-amplified from Col-0 cDNA and transferred to pAG426GAL yeast expression  
532 vector. Recombined vectors were introduced in INVSc1 *S. cerevisiae* yeast strain (ThermoFisher  
533 Scientific) following the lithium acetate/polyethylene glycol method. Yeast transformant were  
534 selected on SC- media lacking relevant molecule(s) (6.7 g/L yeast nitrogen base without amino  
535 acids, 20 g/L glucose, appropriate concentration of relevant Yeast Synthetic Drop-out Medium,  
536 Sigma-Aldrich) and incubated three days at 30°C. For whole-cell metabolic assay, a 2.5 mL SC-  
537 liquid culture was inoculated with a yeast colony and incubated overnight at 180 rpm and 30°C.  
538 Cultures were centrifuged 5 min at 3,000g and cell pellets were washed in 25 mL sterile ultra-pure  
539 water and centrifuged again 5 min 3,000g. Cells were resuspended in 2.5 mL of liquid SC- medium  
540 supplemented with galactose instead of glucose to induce gene expression and incubated at 30°C,  
541 180 rpm. Six hours after induction, yeast cultures were supplemented with 25 µL of 100 mM sterile  
542 *p*-coumarate solution in DMSO and 50 µL of 50 mM sterile L-threonic acid solution in water (5 mM  
543 final concentration each). Following substrates addition, cultures were incubated for 24 h at 30°C,  
544 180 rpm. Metabolites were extracted from whole yeast cultures by adding one volume of methanol  
545 followed by thorough vortexing. Extracts were centrifuged at 16,000g for 10 min to spin down  
546 yeasts. Supernatants were recovered, dried *in vacuo* and resuspended in 50% methanol in 1/5 of  
547 initial volume. Concentrated extracts were analyzed by UHPLC-MS/MS.

548

#### 549 **Generation of *P. patens* transgenic lines**

550  $\Delta PpHCT$  knock-out mutants were generated by protoplast transfection with a genetic disruption  
551 construct allowing introduction of the *NPTII* expression cassette into *PpHCT* locus by homologous  
552 recombination. Genetic construct was made by assembling two 750 bp genomic regions PCR-  
553 amplified from *P. patens* genomic DNA with the *NPTII* selection cassette by GIBSON cloning. The  
554 assembled fragment was then PCR-amplified and blunt-end cloned into the pTA2 vector using the  
555 pJET1.2 cloning kit (ThermoFisher Scientific). *PpHCT* disruption construct was excised from vector  
556 backbone by *EcoRI* digestion, using restriction sites introduced by PCR. Final sterile DNA solution  
557 used for PEG-mediated protoplast transfection contained 45 µg of excised fragment in 0.1 M  
558 Ca(NO<sub>3</sub>)<sub>2</sub>. Protoplast isolation, transfection and regeneration were performed according to (Hohe et  
559 al., 2004). Transformants were selected on Knop plates supplemented with 25 mg l<sup>-1</sup> geneticin  
560 (G418). For *PpHCT:uidA* reporter lines, two genomic regions for homologous recombination framing  
561 the *PpHCT* STOP codon were PCR-amplified from genomic DNA and assembled with the *uidA*  
562 reporter gene following the same procedures as described above. A linker sequence was  
563 introduced by PCR to limit GUS protein hindrance on PpHCT activity. The *PpHCT:uidA* construct  
564 was excised from vector backbone by *NheI* digestion. 50 µg of excised fragment were used for  
565 protoplasts transfection. Since *PpHCT:uidA* does not contain a selection marker, it was co-

566 transfected with the pRT101 plasmid (Girke et al., 1998) containing the *NPTII* selection cassette.  
567 Transformants were selected on Knop plates supplemented with 25 mg l<sup>-1</sup> geneticin (G418).

568

### 569 **Molecular characterization of *P. patens* transgenic lines**

570 Proper genomic integration of DNA construct was assessed using a tailored PCR strategy (**Fig. S2**,  
571 **S7**) with primers listed in **Table S2**. Genomic DNA was extracted with DNA extraction buffer (75 mM  
572 Tris pH 8.8, 20 mM (NH<sub>4</sub>)<sub>2</sub>SO<sub>4</sub> and 0.01 % Tween 20) during 15 min incubation at 45°C under  
573 agitation (1400 rpm). Two microliters were used for direct PCR using the Phire II DNA polymerase  
574 (Thermo Scientific) in a final volume of 20 µl.  $\Delta PpHCT$  mutant lines with seamless 5' and 3'  
575 integration of the genetic construct at the desired locus were checked for the absence of full-length  
576 transcript. Total RNA was isolated and retrotranscribed as described above. *PpHCT* transcripts  
577 were amplified from two microliters of cDNA using the Phire II DNA polymerase (Thermo Scientific).  
578 The constitutively expressed *L21* gene (*Pp3c13\_2360*), encoding a 60S ribosomal protein, was  
579 used as reference. Primers used for RT-PCR are listed in **Table S2**. Four transgenic lines with  
580 complete absence of *HCT* transcripts were selected for subsequent investigations. The MassRuler  
581 DNA Ladder Mix (ThermoFisher Scientific) was used as DNA size marker.

582

### 583 **Determination of HCT activity in *P. patens* protein extracts**

584 Proteins were extracted from three-month-old WT and  $\Delta PpHCT$  gametophores in 2 mL microtubes  
585 containing five volumes of extraction buffer (100 mM Tris-HCl pH 7.4, 10 % glycerol, 2 mM  
586 dithiothreitol, cOMplete™ EDTA-free Protease Inhibitor Cocktail). Samples were homogenized  
587 using 5 mm steel beads and a TissueLyser II (Qiagen) operated at 30 Hz for 5 min. Following a  
588 centrifugation step (20,000g, 4°C, 40 min) supernatants were recovered and transferred to a 50 mL  
589 conical tube. Proteins were precipitated by slow addition to samples of ammonium sulfate up to 0.5  
590 g/mL under constant agitation. Once ammonium sulfate was fully solubilized, samples were  
591 centrifuged for 20 min at 16,000g and 4°C, supernatants discarded and protein pellets resuspended  
592 in 5 mL of extraction buffer. A second round of precipitation and centrifugation was performed to  
593 fully remove plant endogenous metabolites. Protein pellets were resuspended in 500 µL of  
594 extraction buffer. Next, samples were centrifuged (5 min, 18,000g, 4°C) to pellet non-protein  
595 material, supernatants were transferred to new microtubes. Protein concentration was assessed  
596 with the Qubit Protein Assay Kit (ThermoFisher Scientific) and adjusted to 200 ng/µL with extraction  
597 buffer. All steps were performed at 4°C and samples were kept on ice. HCT activity in total proteins  
598 preparation was evaluated from 50 µl end-point enzyme assays containing 50 mM potassium  
599 phosphate buffer (pH 7.4), 2.5 µg total proteins, 1 mM dithiothreitol, 200 µM *p*-coumaroyl-CoA and 5  
600 mM shikimate. Reactions were initiated by addition of *p*-coumaroyl-CoA, incubated at 30°C and  
601 stopped after 1 hour by addition of 50 µL acetonitrile. Production of *p*-coumaroyl-shikimate was  
602 monitored by UHPLC-MS/MS. Relative HCT activity was computed from *p*-coumaroyl-shikimate  
603 peak area and expressed as a percentage of WT.

604

## 605 **Plant tissue collection and metabolite extraction**

606 Liquid cultured gametophores were harvested five weeks after the last disruption, and one week  
607 after nutrient medium change. Plant material was collected by filtration on a 100 µm pore size sieve,  
608 quickly blotted on paper towel and snap-frozen in liquid nitrogen. For *M. polymorpha* and *A.*  
609 *agrestis*, one-month-old thalli were harvested from Petri plates and snapped-frozen in liquid  
610 nitrogen. For *A. thaliana*, whole 3-week-old rosettes were harvested from soil-grown plants and  
611 snap-frozen in liquid nitrogen. Samples were lyophilized for two days; dry material was  
612 homogenized using 5 mm steel beads and a TissueLyser II (Qiagen) for 1 min at 30 Hz. Metabolites  
613 were extracted from 8 mg dry plant powder following a methanol:chloroform:water protocol as  
614 described previously (Renault et al., 2017), except that 500 µl methanol, 250 µl chloroform and 500  
615 µl water were used. For shikimate ester detection in *P. patens*, 250 µl of metabolic extracts were  
616 dried in vacuo, dry residues were resuspended in 50 µl 50% methanol. Acid hydrolysis of metabolic  
617 extract was conducted as reported before (Renault et al., 2017).

618

## 619 **HPLC-UV chromatography**

620 Metabolite separation and detection were carried out on a high-performance liquid chromatography  
621 system (Alliance 2695; Waters) coupled to a photodiode array detector (PDA 2996; Waters). Ten to  
622 twenty microliters of metabolic extract were injected onto Kinetex Core-Shell C18 column (100 x 4.6  
623 mm, 2.6 µm particle size or 150 x 4.6 mm, 5 µm particle size; Phenomenex). The mobile phase  
624 consisted of a mix of [H<sub>2</sub>O + 0.1% formic acid] (solvent A) and [Acetonitrile (ACN) + 0.1% formic  
625 acid] (solvent B). Needle and injection loops were successively washed with weak (95% H<sub>2</sub>O/5%  
626 ACN) and strong (80% ACN/20% H<sub>2</sub>O) solvents. Elution program was as follows: 0.0 min - 95% A;  
627 15.0 min, 5% A (curve 8); 17.0 min, 5% A (curve 6); 18.0 min, 95% A (curve 6); 20.0 min, 95% A.  
628 Flow was set to 1 ml/min and column temperature to 35°C. Absorbance was recorded between 200  
629 and 600 nm. Data were processed with the Empower 3 Software.

630

## 631 **Targeted metabolic profiling by UHPLC-MS/MS**

632 Separation and detection of metabolites were carried out on an ultra-high-performance liquid  
633 chromatography (UHPLC; Dionex UltiMate 3000, ThermoFisher Scientific) coupled to an EvoQ Elite  
634 LC-TQ (MS/MS) mass spectrometer equipped with a heated electrospray ionisation source (HESI)  
635 (Bruker). Three microliters of sample were injected onto a C18 Cortecs<sup>®</sup> UPLC<sup>®</sup> T3 column  
636 (150 × 2.1 mm, 1.6 µm; Waters) and eluted with a mix of LC-MS grade water (A) and acetonitrile (B),  
637 both containing 0.1% formic acid to keep molecules in protonated form. After each injection, needle  
638 and injection loop were washed with 25% acetonitrile solution. Elution program was as follows: 0.0  
639 min - 5% B; 1.0 min - 5% B; 11.5 min - 100% B (curve 8); 13.0 min - 100% B; 14.0 min - 5% B  
640 (curve 6); 15.0 min - 5% B; total run time: 15 min. Flow was set to 0.400 mL/min and column  
641 temperature to 35°C. Nitrogen was used as the drying (30L/h flow rate) and nebulizing gas (35 L/h  
642 flow rate). The interface temperature was set to 350°C and the source temperature to 300°C.

643 Capillary voltage was set to 3.5 kV both for positive and negative ionization modes. MS data  
644 acquisition and LC piloting were performed with the Bruker MS Workstation 8 and Compass Hystar  
645 4.1 SR1 softwares, respectively. Metabolite were ionized in either positive and negative modes and  
646 detected by specific MRM methods (**Table S3**). Bruker MS Data Review software was executed to  
647 integrate peaks and report corresponding areas, which were subsequently normalized to plant dry  
648 weight. Metabolite level was expressed relative to WT.

649

### 650 **Cuticular biopolymer compositional analysis**

651 Cutin monomers analysis was performed on the same gametophore samples used for metabolic  
652 analysis, following a previously published protocol (Renault et al., 2017). Briefly, tissues were  
653 delipidated by extensive washing with a series of solvents. The delipidated tissues, including cuticle,  
654 were dried, weighed and chemically treated (12:3:5 methanol: methyl acetate: 25% sodium  
655 methoxide, 60°C, o/n) to depolymerize cutin. Released monomers were then derivatized with  
656 pyridine and BSTFA (N,O-bis(trimethylsilyl)trifluoroacetamide), dried again by heating under a  
657 stream of nitrogen, and resuspended in 100 µl of chloroform. The samples were analyzed by gas  
658 chromatography (GC) using an Agilent GC 6850 with a Flame Ionization Detector. Compounds were  
659 identified based on a comparison of retention times with standards, and by performing GC–mass  
660 spectrometry (MS) using an Agilent GC 6890 coupled to a JEOL GC MATE II mass spectrometer.  
661 Monomer levels were normalized to internal standards and dry delipidated tissue weights.

662

### 663 **Permeability assay**

664 The permeability test was performed by immersing gametophores in a 0.05% toluidine blue solution  
665 for two minutes, then rinsing with water until the washing solution was clear.

666

### 667 **Production and complementation of an Arabidopsis *hct* null mutant**

668 We generated an *hct* null mutant by CRISPR/Cas9-mediated gene inactivation as described earlier  
669 (DiGennaro et al., 2018). Briefly, *BbsI* restriction enzyme was used to introduce into the *At*-  
670 *psgR/GW* plasmid a double strand fragment resulting from 5'-  
671 GATTGCTCGGTGGCAGGCCGACCA and 5'-AAACTGGTCCGGCCTGCCACCGAGC  
672 oligonucleotides annealing, which targets *HCT* region CTCGGTGGCAGGCCGACCATGG. *At*-  
673 *psgR/GW* with *HCT* genomic target were transferred into the pEarleyGate 301 vector by LR  
674 Clonase reaction (ThermoFisher Scientific). The recombined pEarleyGate 301 vector was  
675 introduced into *Agrobacterium tumefaciens* GV3101 and used to transform Arabidopsis Col-0 by the  
676 floral dip method. Genotyping of T1 and T2 plants was performed by PCR amplifying the genomic  
677 sequence spanning the *HCT* target site using 5'-CCTTCTGAGAGATTGGTTCGAC and 5'-  
678 CTAGCTCGGAGGAGTGTTTCG oligonucleotides, followed by *AvaII* restriction digestion and run on  
679 an agarose gel to assess restriction site loss. The loss of the *At-psgR/GW* cassette at T2 or  
680 subsequent generation was assessed by sensitivity to selective agent (glyphosate). A line, free of  
681 the *At-psgR/GW* cassette and harboring a 7 bp deletion 28 bp after the initiation codon was isolated

682 for this study and named *hct<sup>D7</sup>*. Mutation at the desired locus was confirmed by Sanger sequencing  
683 using PCR fragment generated with 5'-CCTTCTGAGAGAGTTGGTCGAC and 5'-  
684 CTAGCTCGGAGGAGTGTTCG oligonucleotides. *hct<sup>D7</sup>* was subsequently used for  
685 transcomplementation assays with *AtHCT*, *PpHCT* and *MpHCT* coding sequences. To this end,  
686 Gateway pENTRY vectors harboring coding sequences were recombined with the binary pCC0996  
687 vector that contains a 2977 bp promoter fragment from *A. thaliana C4H* gene (Weng et al., 2011).  
688 Resulting plant expression vectors were introduced into *Agrobacterium tumefaciens* GV3101 and  
689 used to transform heterozygous *hct<sup>D7</sup>* plants by the floral dip method. Transformants were selected  
690 with BASTA and *hct<sup>D7</sup>* allele was monitored along the selection process as described above.  
691 Experiments were performed with T3 plants homozygous for both the mutant allele and the  
692 transcomplementating construct.

693

### 694 **Statistical analyses**

695 All statistical analyses were performed with GraphPad v8 software. For enzyme catalytic  
696 parameters, 95% confidence intervals were computed from nonlinear regression curves based on  
697 three independent enzyme assays. For metabolic profiling data, multiple two-tailed unpaired  
698 Student *t*-tests were performed to compare wild-type and mutant means; *P*-values were corrected  
699 using the Holm-Šídák method.

700

### 701 **ACKNOWLEDGEMENTS**

702 Hugues Renault received support from the initiative of excellence IDEX-Unistra (ANR-10-IDEX-  
703 0002-02), the Agence Nationale de la Recherche (ANR 19-CE20-0017-01) and the Institut National  
704 des Sciences Biologiques – CNRS (grant-in-aid “Diversity of Biological Mechanisms”). Ralf Reski  
705 acknowledges support by the Deutsche Forschungsgemeinschaft (DFG, German Research  
706 Foundation) under Germany’s Excellence Strategy – EXC-2189 – Project ID: 390939984. Jocelyn  
707 Rose is supported by grants from the National Science Foundation (NSF-1517546) and the  
708 Agriculture and Food Research Initiative of the United States Department of Agriculture (2016-  
709 67013-24732, J.K.C.R.). Authors would like to thank Pr. Takayuki Kohchi (Kyoto University) and Dr.  
710 Isabel Monte (University of Zürich) for providing *Marchantia polymorpha* and *Anthoceros agrestis*  
711 plants, respectively. We are grateful to Annette Alber who performed initial *in vitro* PpHCT enzyme  
712 assays.

713

### 714 **AUTHORS CONTRIBUTIONS**

715 LK, DW and HR designed the research; LK, SK, EG, DG, IS, LH, JZ and HR performed research;  
716 LK and HR analyzed data; LK and HR wrote the manuscript with critical input of JKCR, RR and DW.

717

718



## Parsed Citations

- Alber, A. V, Renault, H., Basilio-Lopes, A., Bassard, J.-E., Liu, Z., Ullmann, P., Lesot, A., Bihel, F., Schmitt, M., Werck-Reichhart, D., and Ehltng, J. (2019). Evolution of coumaroyl conjugate 3-hydroxylases in land plants: lignin biosynthesis and defense. *Plant J.* 99: 924–936.  
Google Scholar: [Author Only Title Only Author and Title](#)
- Alberti, S., Gitler, A.D., and Lindquist, S. (2007). A suite of Gateway® cloning vectors for high-throughput genetic analysis in *Saccharomyces cerevisiae*. *Yeast* 24: 913–919.  
Google Scholar: [Author Only Title Only Author and Title](#)
- Anisimova, M. and Gascuel, O. (2006). Approximate likelihood-ratio test for branches: A fast, accurate, and powerful alternative. *Syst Biol* 55: 539–552.  
Google Scholar: [Author Only Title Only Author and Title](#)
- Barros, J., Escamilla-Trevino, L., Song, L., Rao, X., Serrani-Yarce, J.C., Palacios, M.D., Engle, N., Choudhury, F.K., Tschaplinski, T.J., Venables, B.J., Mittler, R., and Dixon, R.A. (2019). 4-Coumarate 3-hydroxylase in the lignin biosynthesis pathway is a cytosolic ascorbate peroxidase. *Nat. Commun.* 10: 1–11.  
Google Scholar: [Author Only Title Only Author and Title](#)
- Bassard, J.-E.E. et al. (2012). Protein-protein and protein-membrane associations in the lignin pathway. *Plant Cell* 24: 4465–4482.  
Google Scholar: [Author Only Title Only Author and Title](#)
- Besseau, S., Hoffmann, L., Geoffroy, P., Lapierre, C., Pollet, B., and Legrand, M. (2007). Flavonoid accumulation in *Arabidopsis* repressed in lignin synthesis affects auxin transport and plant growth. *Plant Cell* 19: 148–162.  
Google Scholar: [Author Only Title Only Author and Title](#)
- Bolger, A. et al. (2014). The genome of the stress-tolerant wild tomato species *Solanum pennellii*. *Nat. Genet.* 46: 1034–1038.  
Google Scholar: [Author Only Title Only Author and Title](#)
- Buda, G.J., Barnes, W.J., Fich, E.A., Park, S., Yeats, T.H., Zhao, L., Domozych, D.S., and Rose, J.K. (2013). An ATP binding cassette transporter is required for cuticular wax deposition and desiccation tolerance in the moss *Physcomitrella patens*. *Plant Cell* 25: 4000–4013.  
Google Scholar: [Author Only Title Only Author and Title](#)
- Caldicott, A.B. and Eglinton, G. (1976). Cutin acids from bryophytes: an  $\omega$ -1 hydroxy alkanolic acid in two liverwort species. *Phytochemistry* 15: 1139–1143.  
Google Scholar: [Author Only Title Only Author and Title](#)
- Castresana, J. (2000). Selection of conserved blocks from multiple alignments for their use in phylogenetic analysis. *Mol Biol Evol* 17: 540–552.  
Google Scholar: [Author Only Title Only Author and Title](#)
- Chen, F., Srinivasa Reddy, M.S., Temple, S., Jackson, L., Shadle, G., and Dixon, R.A. (2006). Multi-site genetic modulation of monolignol biosynthesis suggests new routes for formation of syringyl lignin and wall-bound ferulic acid in alfalfa (*Medicago sativa* L.). *Plant J.* 48: 113–124.  
Google Scholar: [Author Only Title Only Author and Title](#)
- Chiang, Y.-C., Levsh, O., Lam, C.K., Weng, J.-K., and Wang, Y. (2018). Structural and dynamic basis of substrate permissiveness in hydroxycinnamoyltransferase (HCT). *PLOS Comput. Biol.* 14: e1006511.  
Google Scholar: [Author Only Title Only Author and Title](#)
- Clé, C., Hill, L.M., Niggeweg, R., Martin, C.R., Guisez, Y., Prinsen, E., and Jansen, M.A.K. (2008). Modulation of chlorogenic acid biosynthesis in *Solanum lycopersicum*; consequences for phenolic accumulation and UV-tolerance. *Phytochemistry* 69: 2149–2156.  
Google Scholar: [Author Only Title Only Author and Title](#)
- Clifford, M.N. (1999). Chlorogenic acids and other cinnamates – nature, occurrence and dietary burden. *J. Sci. Food Agric.* 79: 362–372.  
Google Scholar: [Author Only Title Only Author and Title](#)
- Crooks, G.E., Hon, G., Chandonia, J.M., and Brenner, S.E. (2004). WebLogo: A sequence logo generator. *Genome Res.* 14: 1188–1190.  
Google Scholar: [Author Only Title Only Author and Title](#)
- D’Auria, J.C. (2006). Acyltransferases in plants: a good time to be BAHD. *Curr. Opin. Plant Biol.* 9: 331–340.  
Google Scholar: [Author Only Title Only Author and Title](#)
- DiGennaro, P., Grienenberger, E., Dao, T.Q., Jun, J.H., and Fletcher, J.C. (2018). Peptide signaling molecules CLE5 and CLE6 affect *Arabidopsis* leaf shape downstream of leaf patterning transcription factors and auxin. *Plant Direct* 2: e00103.  
Google Scholar: [Author Only Title Only Author and Title](#)
- Edgar, R.C. (2004). MUSCLE: multiple sequence alignment with high accuracy and high throughput. *Nucleic Acids Res* 32: 1792–1797.  
Google Scholar: [Author Only Title Only Author and Title](#)
- Eudes, A., Pereira, J.H., Yogiswara, S., Wang, G., Teixeira Benites, V., Baidoo, E.E.K., Lee, T.S., Adams, P.D., Keasling, J.D., and Loqué, D. (2016). Exploiting the substrate promiscuity of Hydroxycinnamoyl-CoA:Shikimate Hydroxycinnamoyl Transferase to reduce lignin.

**Plant Cell Physiol.** 57: 568–579.

Google Scholar: [Author Only](#) [Title Only](#) [Author and Title](#)

**Fich, E.A., Segerson, N.A., and Rose, J.K. (2016).** The plant polyester cutin: biosynthesis, structure, and biological roles. *Annu. Rev. Plant Biol.* 67: 207–233.

Google Scholar: [Author Only](#) [Title Only](#) [Author and Title](#)

**Franke, R., Humphreys, J.M., Hemm, M.R., Denault, J.W., Ruegger, M.O., Cusumano, J.C., and Chapple, C. (2002).** The Arabidopsis REF8 gene encodes the 3-hydroxylase of phenylpropanoid metabolism. *Plant J.* 30: 33–45.

Google Scholar: [Author Only](#) [Title Only](#) [Author and Title](#)

**Gallego-Giraldo, L., Jikumaru, Y., Kamiya, Y., Tang, Y., and Dixon, R.A. (2011).** Selective lignin downregulation leads to constitutive defense response expression in alfalfa (*Medicago sativa* L.). *New Phytol.* 190: 627–639.

Google Scholar: [Author Only](#) [Title Only](#) [Author and Title](#)

**Girke, T., Schmidt, H., Zahringer, U., Reski, R., and Heinz, E. (1998).** Identification of a novel delta 6-acyl-group desaturase by targeted gene disruption in *Physcomitrella patens*. *Plant J.* 15: 39–48.

Google Scholar: [Author Only](#) [Title Only](#) [Author and Title](#)

**Goddard, T.D., Huang, C.C., Meng, E.C., Pettersen, E.F., Couch, G.S., Morris, J.H., and Ferrin, T.E. (2018).** UCSF ChimeraX: Meeting modern challenges in visualization and analysis. *Protein Sci.* 27: 14–25.

Google Scholar: [Author Only](#) [Title Only](#) [Author and Title](#)

**Green, M.A. and Fry, S.C. (2005).** Vitamin C degradation in plant cells via enzymatic hydrolysis of 4-O-oxalyl-L-threonate. *Nature* 433: 83–87.

Google Scholar: [Author Only](#) [Title Only](#) [Author and Title](#)

**Guindon, S., Dufayard, J.F., Lefort, V., Anisimova, M., Hordijk, W., and Gascuel, O. (2010).** New algorithms and methods to estimate maximum-likelihood phylogenies: assessing the performance of PhyML 3.0. *Syst Biol* 59: 307–321.

Google Scholar: [Author Only](#) [Title Only](#) [Author and Title](#)

**Herrmann, K.M. and Weaver, L.M. (1999).** The shikimate pathway. *Annu. Rev. Plant Biol.* 50: 473–503.

Google Scholar: [Author Only](#) [Title Only](#) [Author and Title](#)

**Hoffmann, L., Besseau, S., Geoffroy, P., Ritzenthaler, C., Meyer, D., Lapierre, C., Pollet, B., and Legrand, M. (2004).** Silencing of hydroxycinnamoyl-coenzyme A shikimate/quinic acid hydroxycinnamoyltransferase affects phenylpropanoid biosynthesis. *Plant Cell* 16: 1446–1465.

Google Scholar: [Author Only](#) [Title Only](#) [Author and Title](#)

**Hoffmann, L., Maury, S., Martz, F., Geoffroy, P., and Legrand, M. (2003).** Purification, cloning, and properties of an acyltransferase controlling shikimate and quinic acid ester intermediates in phenylpropanoid metabolism. *J. Biol. Chem.* 278: 95–103.

Google Scholar: [Author Only](#) [Title Only](#) [Author and Title](#)

**Hohe, A., Egener, T., Lucht, J.M., Holtorf, H., Reinhard, C., Schween, G., and Reski, R. (2004).** An improved and highly standardised transformation procedure allows efficient production of single and multiple targeted gene-knockouts in a moss, *Physcomitrella patens*. *Curr Genet* 44: 339–347.

Google Scholar: [Author Only](#) [Title Only](#) [Author and Title](#)

**Jiao, C. et al. (2020).** The *Penium margaritaceum* genome: Hallmarks of the origins of land plants. *Cell* 181: 1097–1111.e12.

Google Scholar: [Author Only](#) [Title Only](#) [Author and Title](#)

**Kenrick, P. and Crane, P.R. (1997).** The origin and early evolution of plants on land. *Nature* 389: 33–39.

Google Scholar: [Author Only](#) [Title Only](#) [Author and Title](#)

**Kosma, D.K., Bourdenx, B., Bernard, A., Parsons, E.P., Lü, S., Joubès, J., and Jenks, M.A. (2009).** The impact of water deficiency on leaf cuticle lipids of *Arabidopsis*. *Plant Physiol.* 151: 1918 LP – 1929.

Google Scholar: [Author Only](#) [Title Only](#) [Author and Title](#)

**Krauss, P., Markstadter, C., and Riederer, M. (1997).** Attenuation of UV radiation by plant cuticles from woody species. *Plant. Cell Environ.* 20: 1079–1085.

Google Scholar: [Author Only](#) [Title Only](#) [Author and Title](#)

**Lallemand, L.A., Zubieta, C., Lee, S.G., Wang, Y., Acajjaoui, S., Timmins, J., McSweeney, S., Jez, J.M., McCarthy, J.G., and McCarthy, A.A. (2012).** A structural basis for the biosynthesis of the major chlorogenic acids found in coffee. *Plant Physiol.* 160: 249–260.

Google Scholar: [Author Only](#) [Title Only](#) [Author and Title](#)

**Lang, D. et al. (2018).** The *Physcomitrella patens* chromosome-scale assembly reveals moss genome structure and evolution. *Plant J.* 93: 515–533.

Google Scholar: [Author Only](#) [Title Only](#) [Author and Title](#)

**Le, S.Q. and Gascuel, O. (2008).** An improved general amino acid replacement matrix. *Mol Biol Evol* 25: 1307–1320.

Google Scholar: [Author Only](#) [Title Only](#) [Author and Title](#)

**Lehfeldt, C., Shirley, A.M., Meyer, K., Ruegger, M.O., Cusumano, J.C., Viitanen, P. V., Strack, D., and Chapple, C. (2000).** Cloning of the

**SNG1 gene of arabidopsis reveals a role for a serine carboxypeptidase-like protein as an acyltransferase in secondary metabolism.** *Plant Cell* 12: 1295–1306.

Google Scholar: [Author Only Title Only Author and Title](#)

Lenton, T.M., Dahl, T.W., Daines, S.J., Mills, B.J., Ozaki, K., Saltzman, M.R., and Porada, P. (2016). Earliest land plants created modern levels of atmospheric oxygen. *Proc. Natl. Acad. Sci. USA* 113: 9704–9709.

Google Scholar: [Author Only Title Only Author and Title](#)

Levsh, O., Chiang, Y.C., Tung, C.F., Noel, J.P., Wang, Y., and Weng, J.K. (2016). Dynamic conformational states dictate selectivity toward the native substrate in a substrate-permissive acyltransferase. *Biochemistry* 55: 6314–6326.

Google Scholar: [Author Only Title Only Author and Title](#)

Levsh, O., Pluskal, T., Carballo, V., Mitchell, A.J., and Weng, J.K. (2019). Independent evolution of rosmarinic acid biosynthesis in two sister families under the Lamiales clade of flowering plants. *J. Biol. Chem.* 294: 15193–15205.

Google Scholar: [Author Only Title Only Author and Title](#)

Li, X., Bonawitz, N.D., Weng, J.K., and Chapple, C. (2010a). The growth reduction associated with repressed lignin biosynthesis in *Arabidopsis thaliana* is independent of flavonoids. *Plant Cell* 22: 1620–1632.

Google Scholar: [Author Only Title Only Author and Title](#)

Li, X. u., Bergelson, J., and Chapple, C. (2010b). The *Arabidopsis* accession Pna-10 is a naturally occurring sng1 deletion mutant. *Mol. Plant* 3: 91–100.

Google Scholar: [Author Only Title Only Author and Title](#)

Liu, Z., Tavares, R., Forsythe, E.S., Andre, F., Lugan, R., Jonasson, G., Boutet-Mercey, S., Tohge, T., Beilstein, M.A., Werck-Reichhart, D., and Renault, H. (2016). Evolutionary interplay between sister cytochrome P450 genes shapes plasticity in plant metabolism. *Nat. Commun.* 7: 13026.

Google Scholar: [Author Only Title Only Author and Title](#)

Lü, S., Zhao, H., Des Marais, D.L., Parsons, E.P., Wen, X., Xu, X., Bangarusamy, D.K., Wang, G., Rowland, O., Juenger, T., Bressan, R.A., and Jenks, M.A. (2012). *Arabidopsis* ECERIFERUM9 involvement in cuticle formation and maintenance of plant water status. *Plant Physiol.* 159: 930 LP – 944.

Google Scholar: [Author Only Title Only Author and Title](#)

Matsuno, M. et al. (2009). Evolution of a novel phenolic pathway for pollen development. *Science* (80-. ). 325: 1688–1692.

Google Scholar: [Author Only Title Only Author and Title](#)

Molina, I., Bonaventure, G., Ohlrogge, J., and Pollard, M. (2006). The lipid polyester composition of *Arabidopsis thaliana* and *Brassica napus* seeds. *Phytochemistry* 67: 2597–2610.

Google Scholar: [Author Only Title Only Author and Title](#)

Morris, J.L., Puttick, M.N., Clark, J.W., Edwards, D., Kenrick, P., Pressel, S., Wellman, C.H., Yang, Z., Schneider, H., and Donoghue, P.C.J. (2018). The timescale of early land plant evolution. *Proc. Natl. Acad. Sci. USA* 115: 201719588.

Google Scholar: [Author Only Title Only Author and Title](#)

Nawrath, C., Schreiber, L., Franke, R.B., Geldner, N., Reina-Pinto, J.J., and Kunst, L. (2013). Apoplastic diffusion barriers in *Arabidopsis*. *Arab. B.* 11: e0167.

Google Scholar: [Author Only Title Only Author and Title](#)

Niggeweg, R., Michael, A.J., and Martin, C. (2004). Engineering plants with increased levels of the antioxidant chlorogenic acid. *Nat. Biotechnol.* 22: 746–754.

Google Scholar: [Author Only Title Only Author and Title](#)

Perroud, P.-F. et al. (2018). The *Physcomitrella patens* gene atlas project: large-scale RNA-seq based expression data. *Plant J.* 95: 168–182.

Google Scholar: [Author Only Title Only Author and Title](#)

Philippe, G., Sørensen, I., Jiao, C., Sun, X., Fei, Z., Domozych, D.S., and Rose, J.K. (2020). Cutin and suberin: assembly and origins of specialized lipidic cell wall scaffolds. *Curr. Opin. Plant Biol.* 55: 11–20.

Google Scholar: [Author Only Title Only Author and Title](#)

Porada, P., Lenton, T.M., Pohl, A., Weber, B., Mander, L., Donnadieu, Y., Beer, C., Poschl, U., and Kleidon, A. (2016). High potential for weathering and climate effects of non-vascular vegetation in the Late Ordovician. *Nat. Commun.* 7: 12113.

Google Scholar: [Author Only Title Only Author and Title](#)

Puttick, M.N., Morris, J.L., Williams, T.A., Cox, C.J., Edwards, D., Kenrick, P., Pressel, S., Wellman, C.H., Schneider, H., Pisani, D., and Donoghue, P.C.J.J. (2018). The interrelationships of land plants and the nature of the ancestral embryophyte. *Curr. Biol.* 28: 733–745.

Google Scholar: [Author Only Title Only Author and Title](#)

Ralph, J., Lapierre, C., and Boerjan, W. (2019). Lignin structure and its engineering. *Curr. Opin. Biotechnol.* 56: 240–249.

Google Scholar: [Author Only Title Only Author and Title](#)

Rautengarten, C., Ebert, B., Ouellet, M., Nafisi, M., Baidoo, E.E., Benke, P., Stranne, M., Mukhopadhyay, A., Keasling, J.D., Sakuragi, Y., and Scheller, H. V (2012). *Arabidopsis* Deficient in Cutin Ferulate encodes a transferase required for feruloylation of  $\omega$ -hydroxy fatty

**acids in cutin polyester. Plant Physiol 158: 654–665.**

Google Scholar: [Author Only](#) [Title Only](#) [Author and Title](#)

**Renault, H. et al. (2017). A phenol-enriched cuticle is ancestral to lignin evolution in land plants. Nat. Commun. 8: 14713.**

Google Scholar: [Author Only](#) [Title Only](#) [Author and Title](#)

**Renault, H., Werck-Reichhart, D., and Weng, J.-K. (2019). Harnessing lignin evolution for biotechnological applications. Curr. Opin. Biotechnol. 56: 105–111.**

Google Scholar: [Author Only](#) [Title Only](#) [Author and Title](#)

**Rensing, S.A et al. (2008). The Physcomitrella genome reveals evolutionary insights into the conquest of land by plants. Science (80-. ). 319: 64–69.**

Google Scholar: [Author Only](#) [Title Only](#) [Author and Title](#)

**Reski, R. (2018). Enabling the water-to-land transition. Nat. Plants 4: 67–68.**

Google Scholar: [Author Only](#) [Title Only](#) [Author and Title](#)

**Reski, R. and Abel, W.O. (1985). Induction of budding on chloronemata and caulonemata of the moss, Physcomitrella patens, using isopentenyladenine. Planta 165: 354–358.**

Google Scholar: [Author Only](#) [Title Only](#) [Author and Title](#)

**Retallack, G.J. (1997). Early forest soils and their role in devonian global change. Science (80-. ). 276: 583–585.**

Google Scholar: [Author Only](#) [Title Only](#) [Author and Title](#)

**Riley, R.G. and Kolattukudy, P.E. (1975). Evidence for covalently attached p-coumaric acid and ferulic acid in cutins and suberins. Plant Physiol. 56: 650–654.**

Google Scholar: [Author Only](#) [Title Only](#) [Author and Title](#)

**Robert, X. and Gouet, P. (2014). Deciphering key features in protein structures with the new ENDscript server. Nucleic Acids Res. 42: W320–W324.**

Google Scholar: [Author Only](#) [Title Only](#) [Author and Title](#)

**Ruijter, J.M., Ramakers, C., Hoogaars, W.M., Karlen, Y., Bakker, O., van den Hoff, M.J., and Moorman, A.F. (2009). Amplification efficiency: linking baseline and bias in the analysis of quantitative PCR data. Nucleic Acids Res 37: e45.**

Google Scholar: [Author Only](#) [Title Only](#) [Author and Title](#)

**Saleme, M. de L.S. et al. (2017). Silencing CAFFEOYL SHIKIMATE ESTERASE affects lignification and improves saccharification in poplar. Plant Physiol. 175: 1040 LP – 1057.**

Google Scholar: [Author Only](#) [Title Only](#) [Author and Title](#)

**Sali, A. and Blundell, T.L. (1993). Comparative protein modelling by satisfaction of spatial restraints. J Mol Biol 234: 779–815.**

Google Scholar: [Author Only](#) [Title Only](#) [Author and Title](#)

**Sander, M. and Petersen, M. (2011). Distinct substrate specificities and unusual substrate flexibilities of two hydroxycinnamoyltransferases, rosmarinic acid synthase and hydroxycinnamoyl-CoA:shikimate hydroxycinnamoyl-transferase, from Coleus blumei Benth. Planta 233: 1157–1171.**

Google Scholar: [Author Only](#) [Title Only](#) [Author and Title](#)

**Schoch, G., Goepfert, S., Morant, M., Hehn, A., Meyer, D., Ullmann, P., and Werck-Reichhart, D. (2001). CYP98A3 from Arabidopsis thaliana is a 3'-hydroxylase of phenolic esters, a missing link in the phenylpropanoid pathway. J. Biol. Chem. 276: 36566–36574.**

Google Scholar: [Author Only](#) [Title Only](#) [Author and Title](#)

**Schoch, G.A., Attias, R., Le Ret, M., and Werck-Reichhart, D. (2003). Key substrate recognition residues in the active site of a plant cytochrome P450, CYP73A1 - Homology model guided site-directed mutagenesis. Eur. J. Biochem. 270: 3684–3695.**

Google Scholar: [Author Only](#) [Title Only](#) [Author and Title](#)

**Silber, M. V, Meimberg, H., and Ebel, J. (2008). Identification of a 4-coumarate:CoA ligase gene family in the moss, Physcomitrella patens. Phytochemistry 69: 2449–2456.**

Google Scholar: [Author Only](#) [Title Only](#) [Author and Title](#)

**Urban, P., Mignotte, C., Kazmaier, M., Delorme, F., and Pompon, D. (1997). Cloning, yeast expression, and characterization of the coupling of two distantly related Arabidopsis thaliana NADPH-cytochrome P450 reductases with P450 CYP73A5. J Biol Chem 272: 19176–19186.**

Google Scholar: [Author Only](#) [Title Only](#) [Author and Title](#)

**Vanholme, R. et al. (2013). Caffeoyl shikimate esterase (CSE) is an enzyme in the lignin biosynthetic pathway in Arabidopsis. Science 341: 1103–6.**

Google Scholar: [Author Only](#) [Title Only](#) [Author and Title](#)

**Vogt, T. (2010). Phenylpropanoid biosynthesis. Mol. Plant 3: 2–20.**

Google Scholar: [Author Only](#) [Title Only](#) [Author and Title](#)

**de Vries, J. and Archibald, J.M. (2018). Plant evolution: landmarks on the path to terrestrial life. New Phytol. 217: 1428–1434.**

Google Scholar: [Author Only](#) [Title Only](#) [Author and Title](#)

**de Vries, J., de Vries, S., Slamovits, C.H., Rose, L.E., and Archibald, J.M. (2017). How embryophytic is the biosynthesis of phenylpropanoids and their derivatives in streptophyte algae? *Plant Cell Physiol.* 58: 934–945.**

Google Scholar: [Author Only](#) [Title Only](#) [Author and Title](#)

**Wagner, A., Ralph, J., Akiyama, T., Flint, H., Phillips, L., Torr, K., Nanayakkara, B., and Kiri, L. Te (2007). Exploring lignification in conifers by silencing hydroxycinnamoyl-CoA:shikimate hydroxycinnamoyltransferase in *Pinus radiata*. *Proc. Natl. Acad. Sci.* 104: 11856–11861.**

Google Scholar: [Author Only](#) [Title Only](#) [Author and Title](#)

**Weng, J.K., Akiyama, T., Ralph, J., and Chapple, C. (2011). Independent recruitment of an O-methyltransferase for syringyl lignin biosynthesis in *Selaginella moellendorffii*. *Plant Cell* 23: 2708–2724.**

Google Scholar: [Author Only](#) [Title Only](#) [Author and Title](#)

**Weng, J.K. and Chapple, C. (2010). The origin and evolution of lignin biosynthesis. *New Phytol.* 187: 273–285.**

Google Scholar: [Author Only](#) [Title Only](#) [Author and Title](#)

**Wickett, N.J. et al. (2014). Phylotranscriptomic analysis of the origin and early diversification of land plants. *Proc. Natl. Acad. Sci. USA* 111: E4859–68.**

Google Scholar: [Author Only](#) [Title Only](#) [Author and Title](#)

**Yeats, T.H. and Rose, J.K.C. (2013). The formation and function of plant cuticles. *Plant Physiol.* 163: 5–20.**

Google Scholar: [Author Only](#) [Title Only](#) [Author and Title](#)
